# Supplementary material for: Spontaneous and cued gaze-following in autism and Williams syndrome
Source: PubMed Central journal article supplement (PMC3766200; doi:10.1186/1866-1955-5-13), 2013-05-10

Riby, Hancock, Jones & Hanley

In following images, top left is the image shown, with target AOI in red, plausible targets (target2) in blue and implausible ones (target3) in green. Top right image is average gaze hotspots during cued viewing for all the TD participants, bottom left participants with Autism, bottom right with WS.

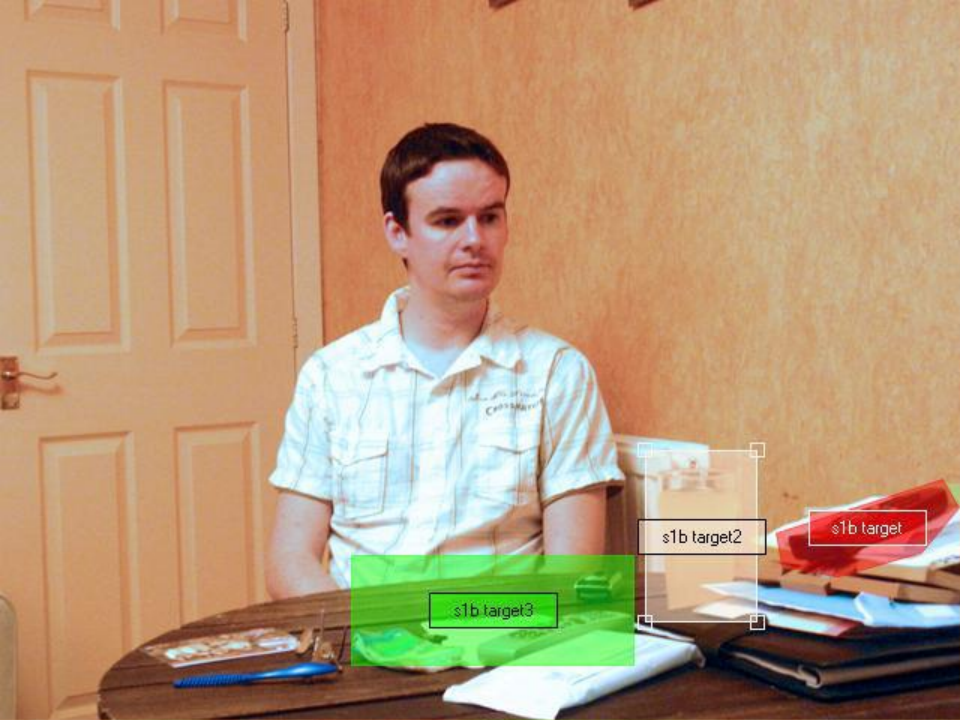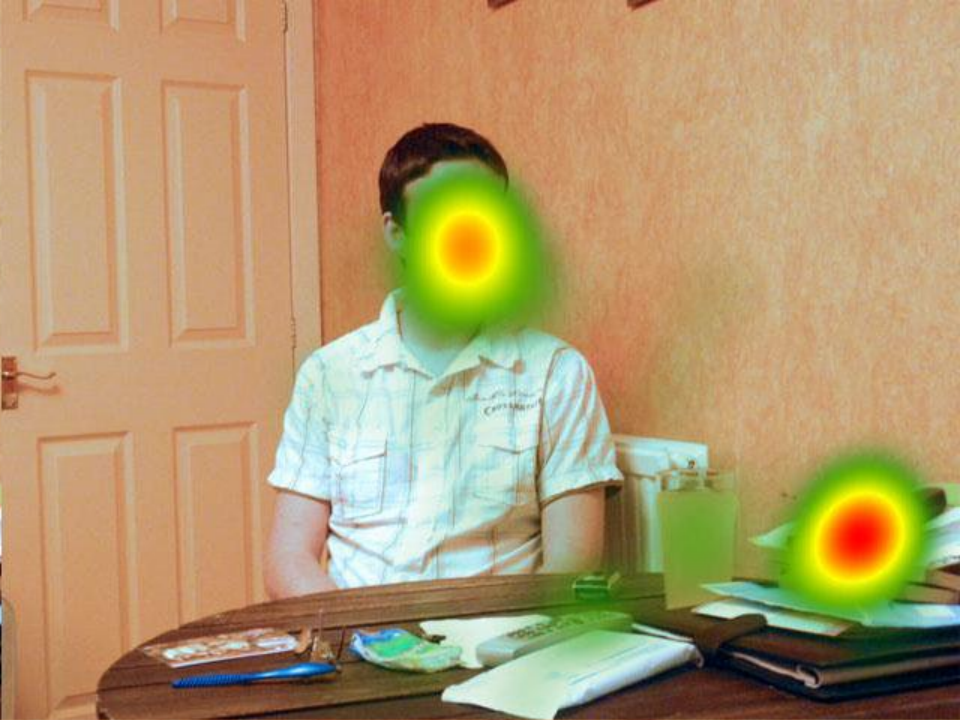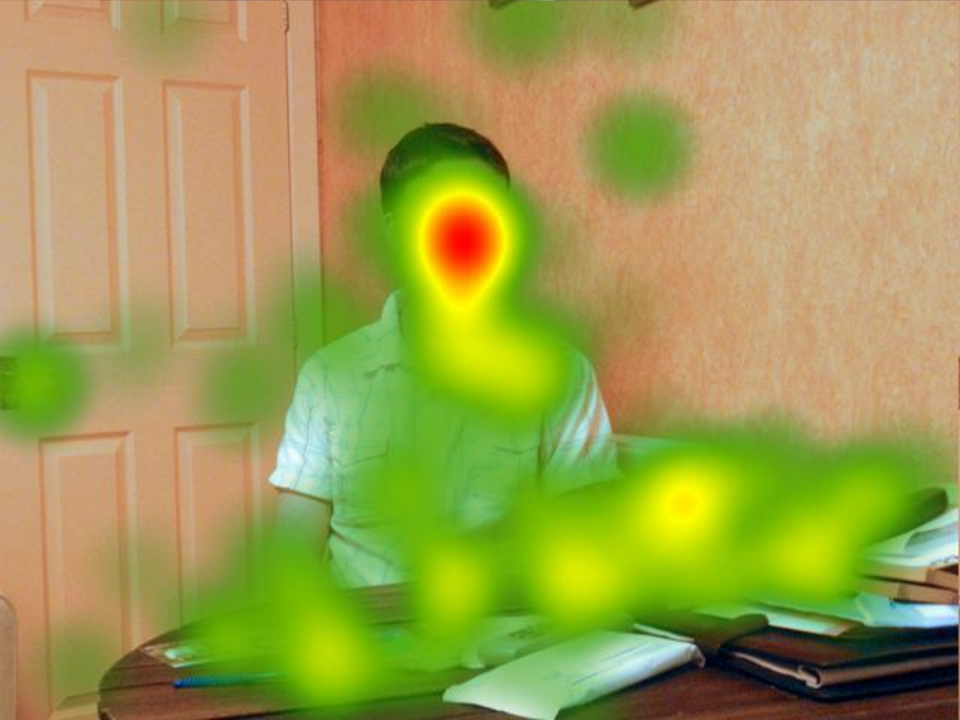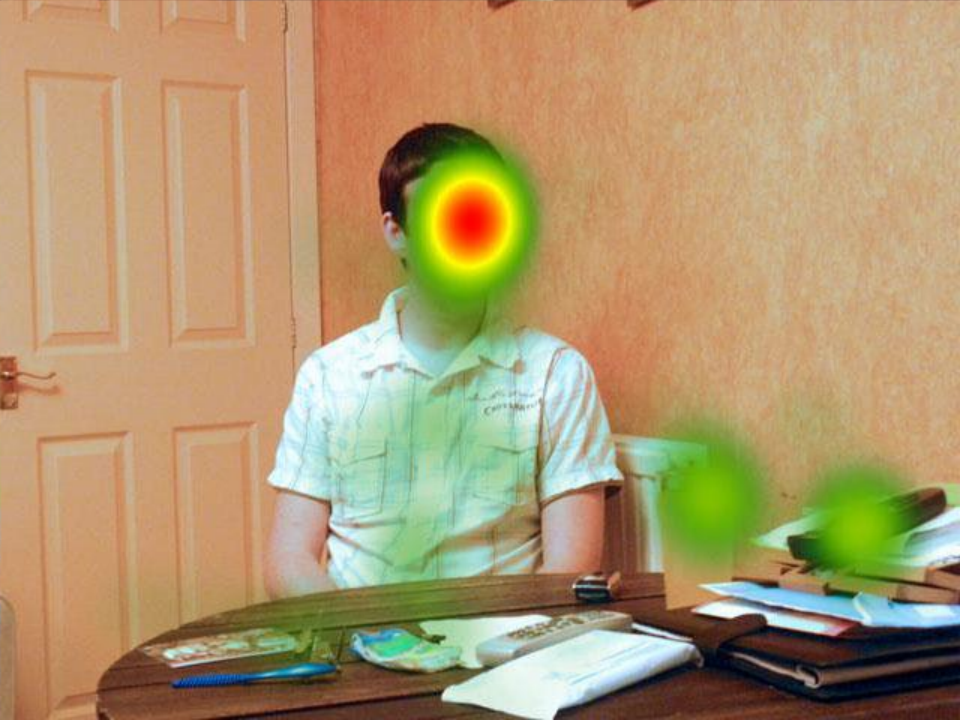



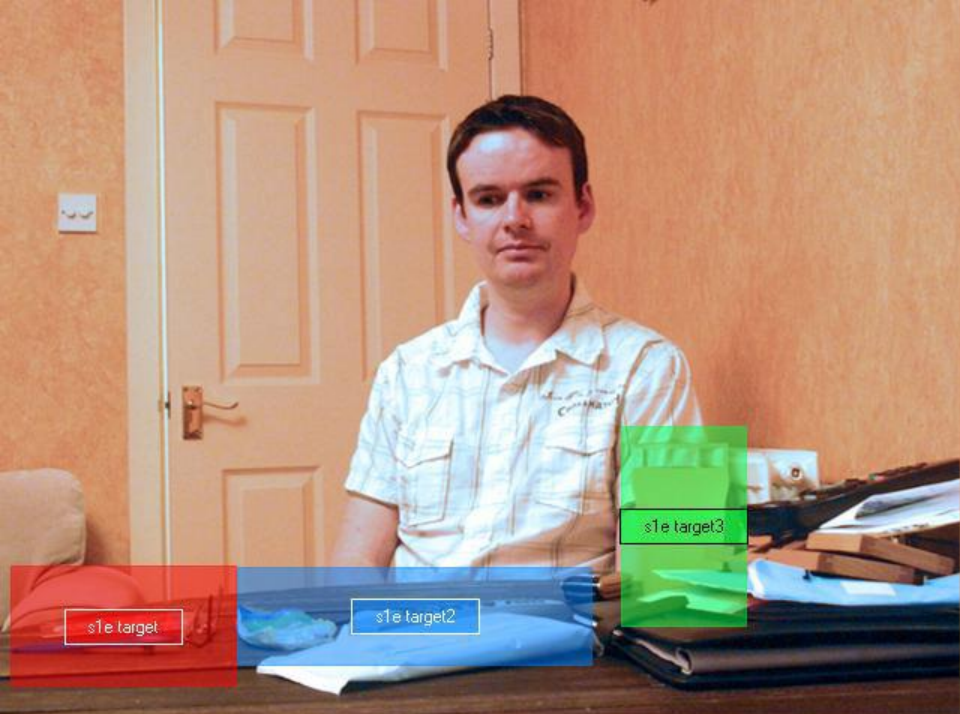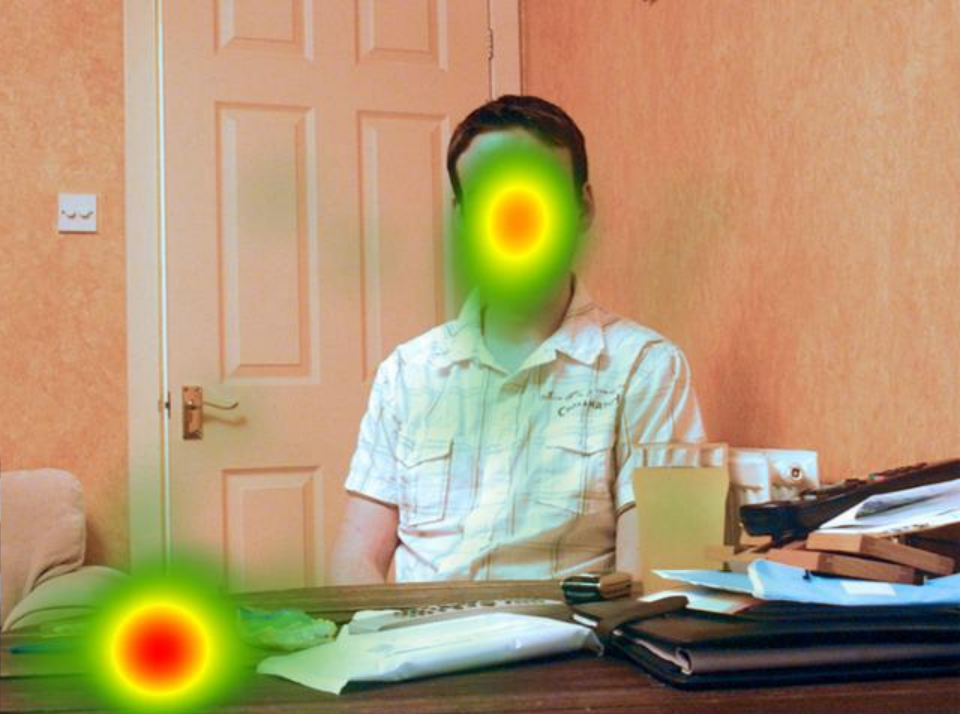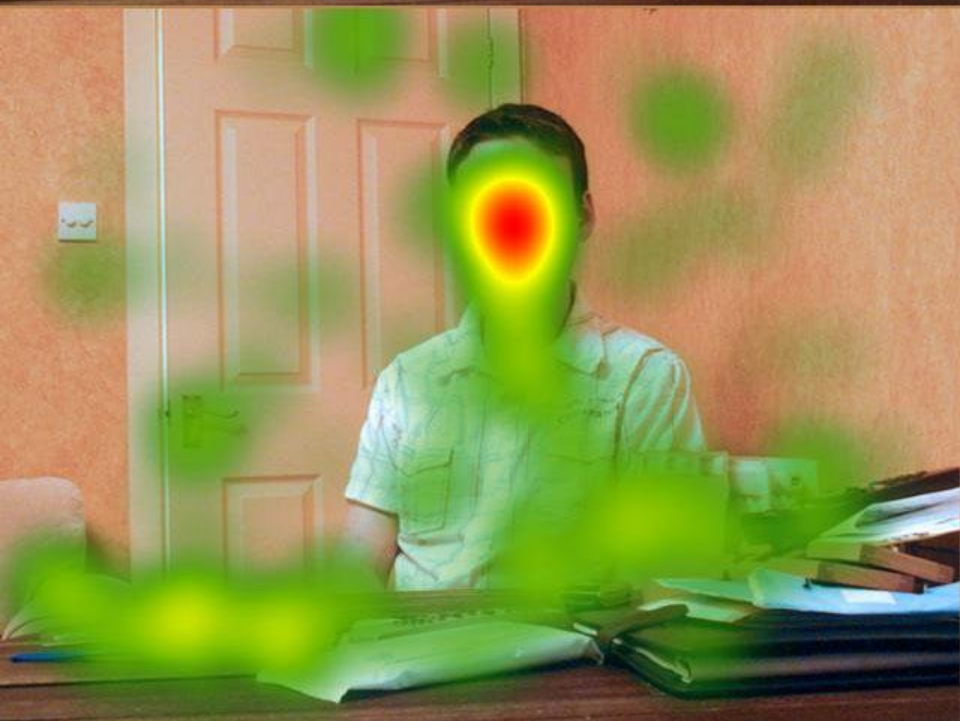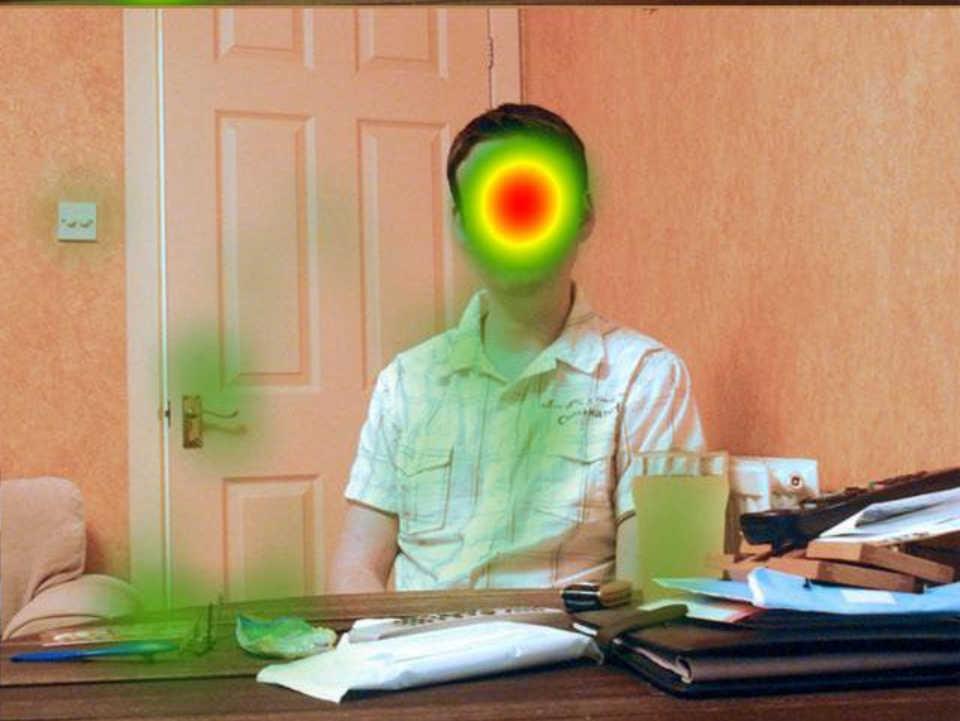



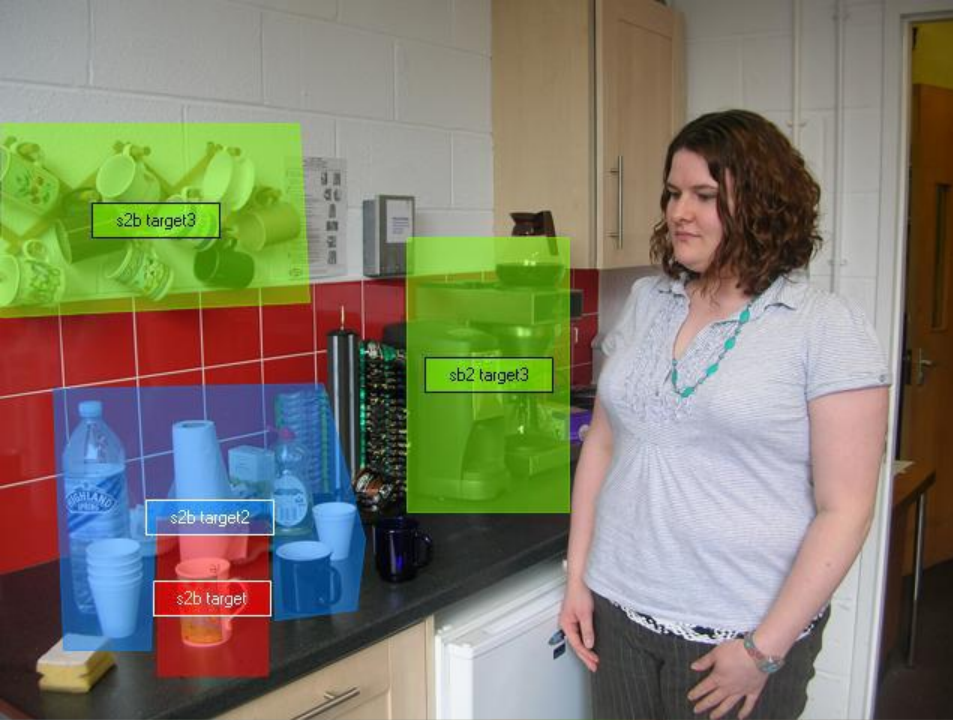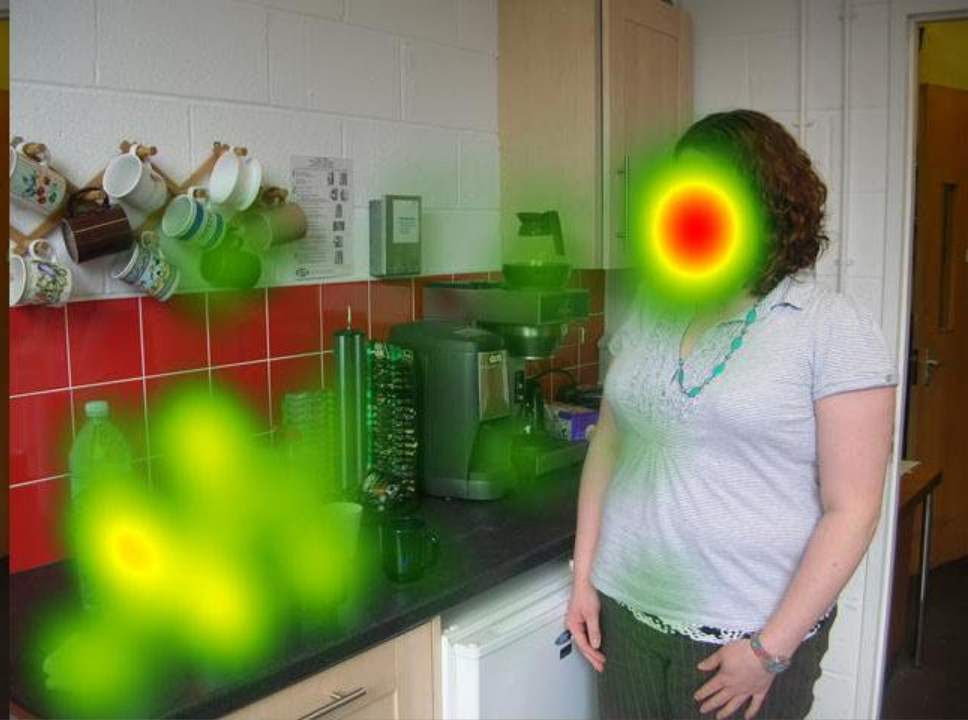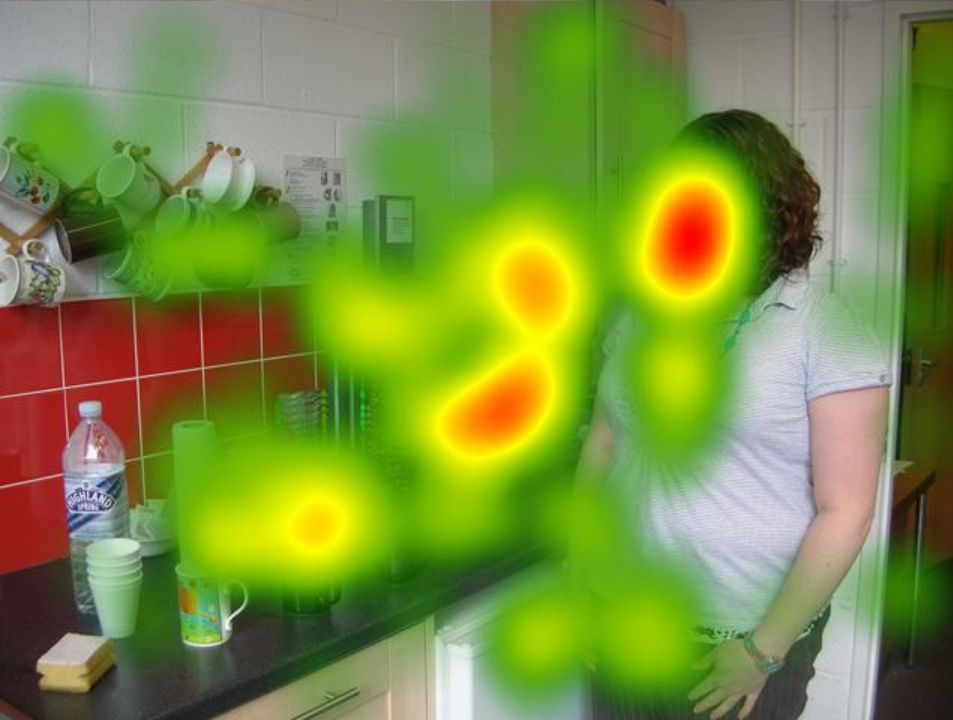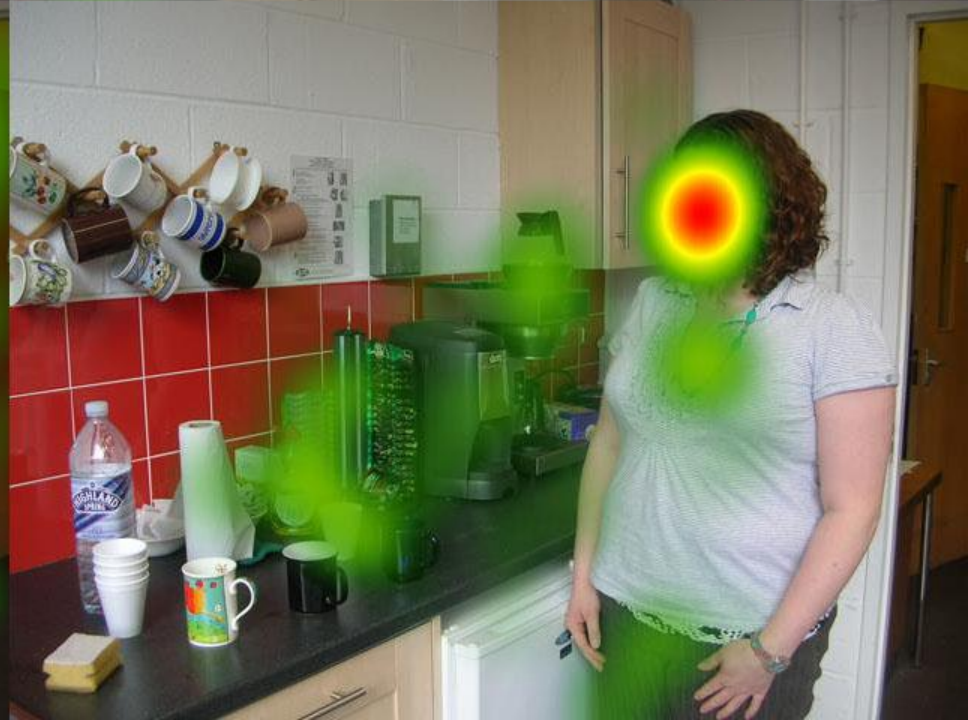



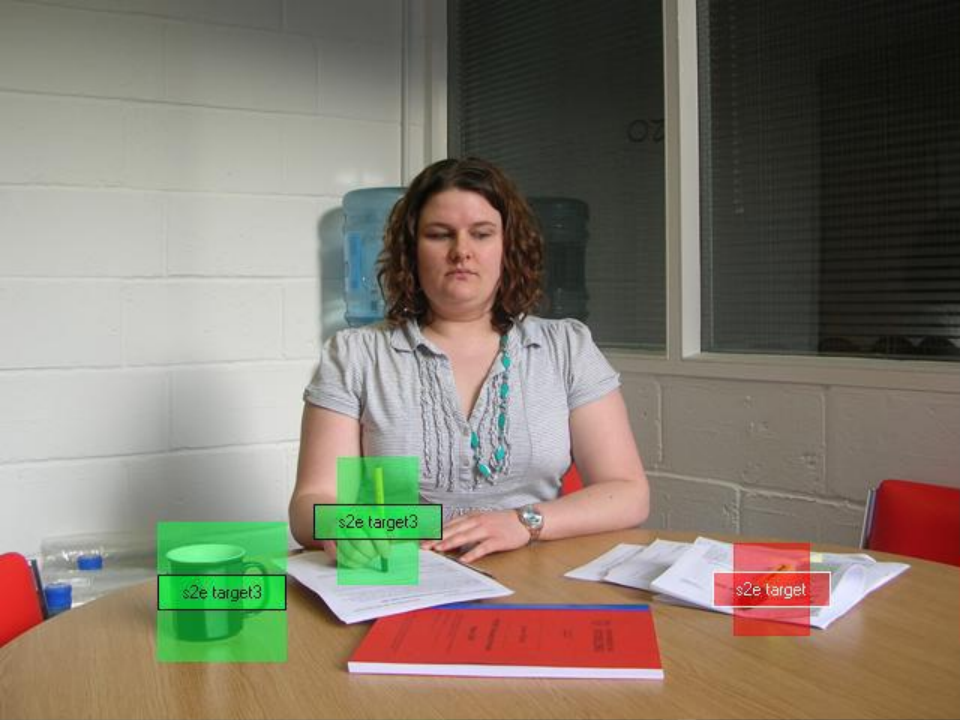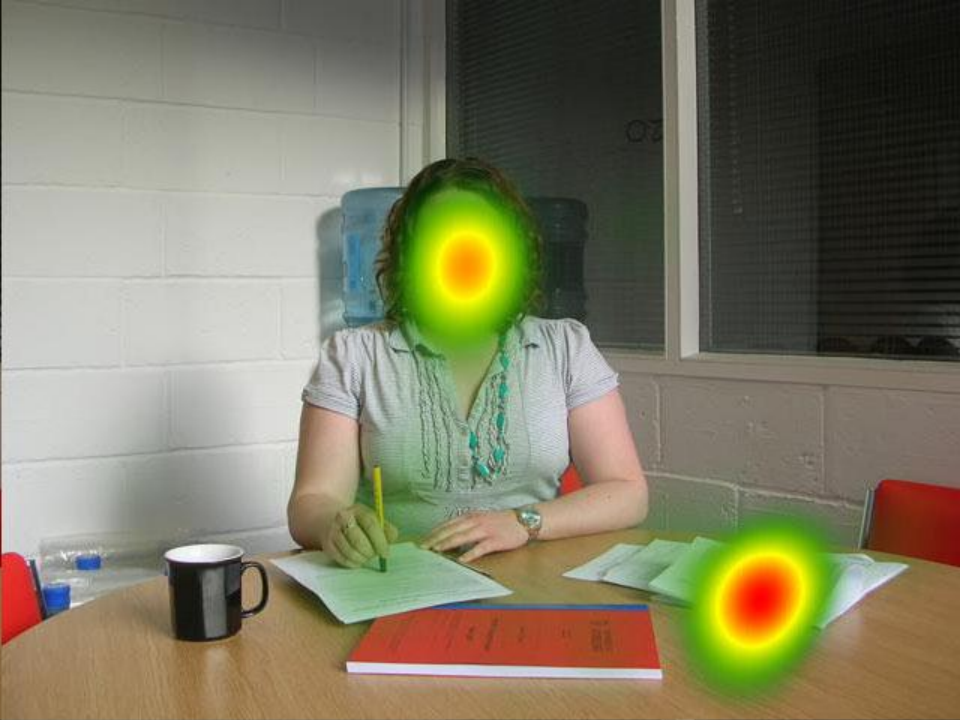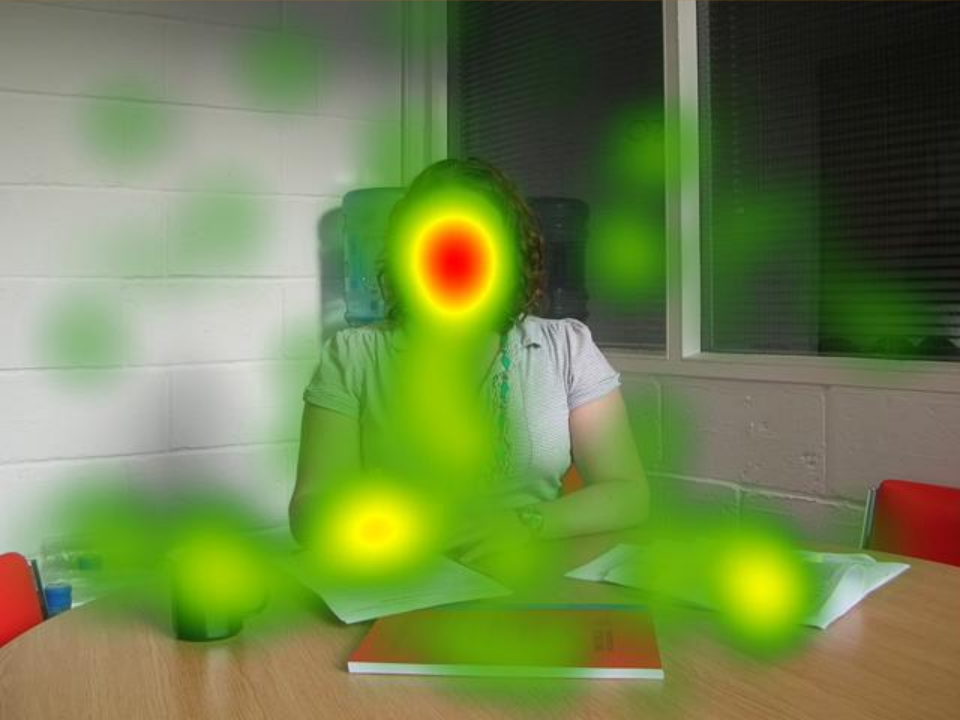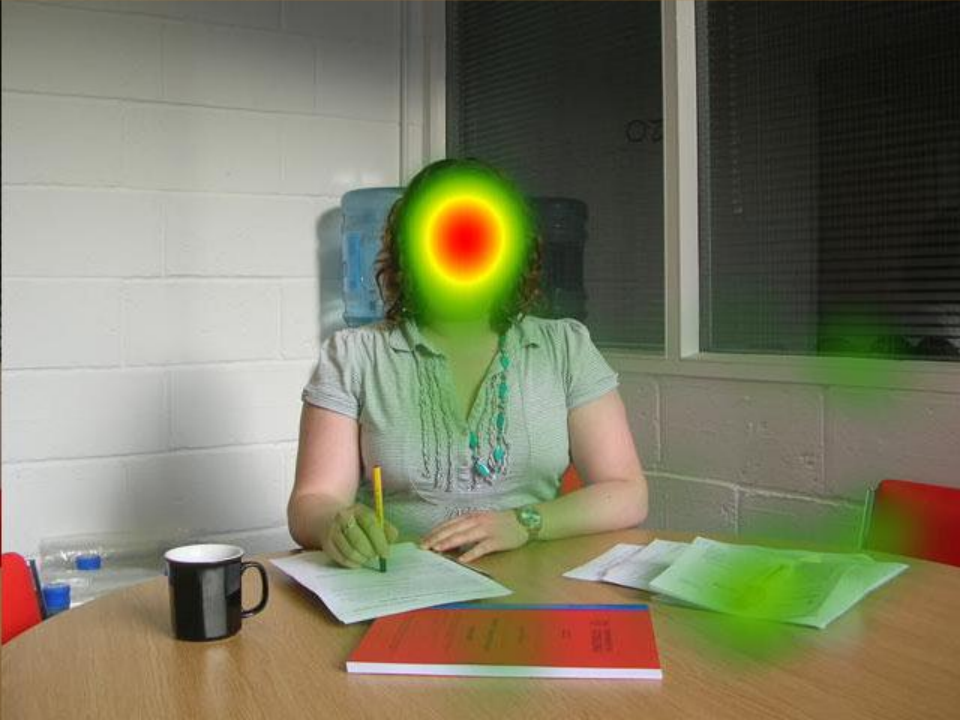



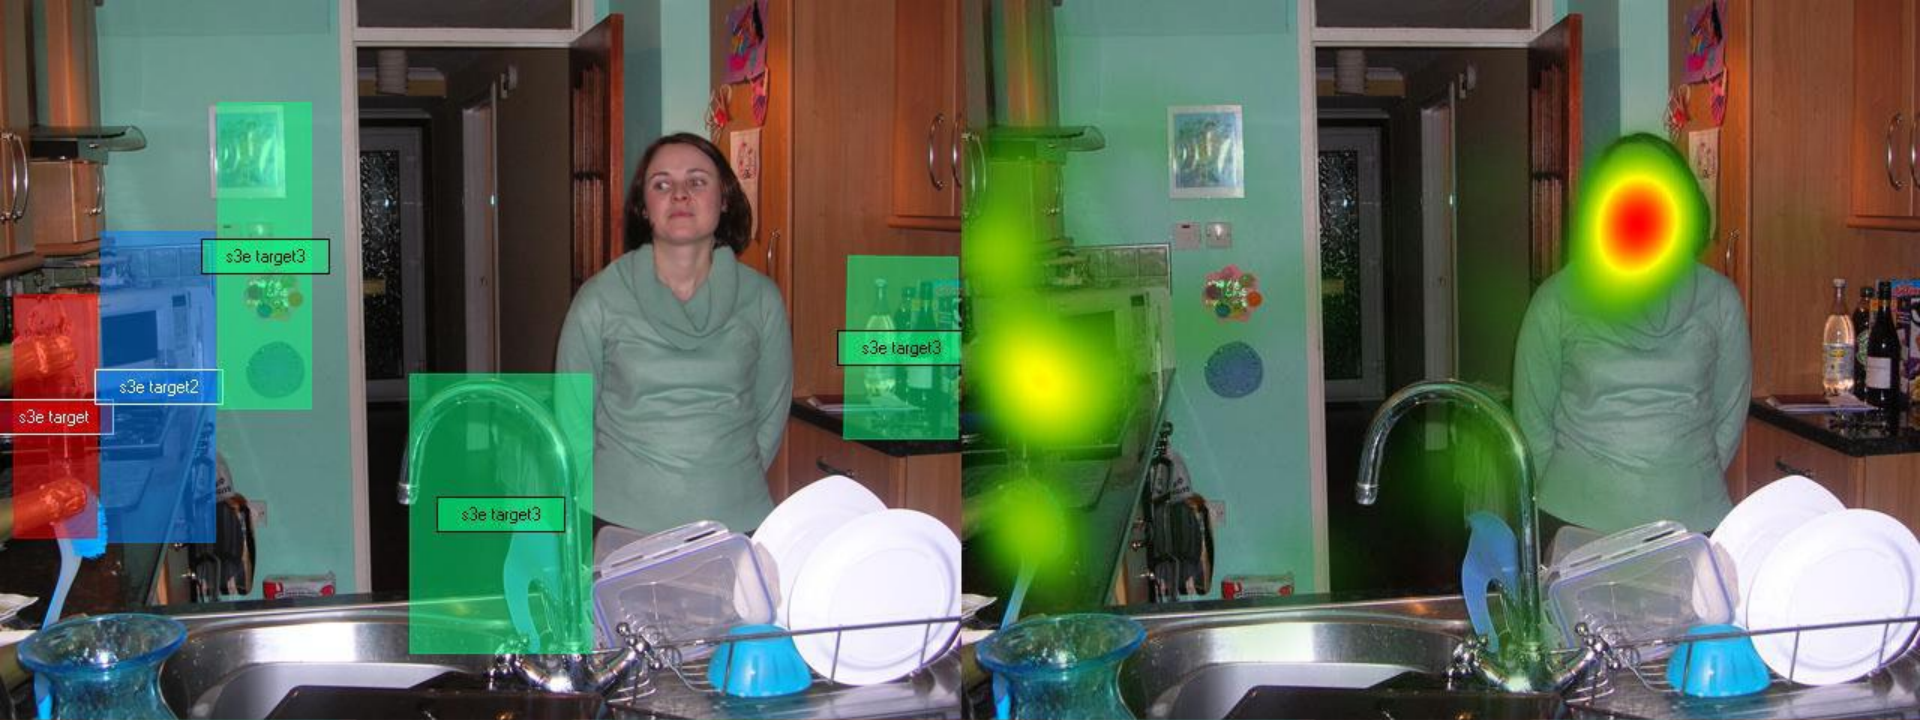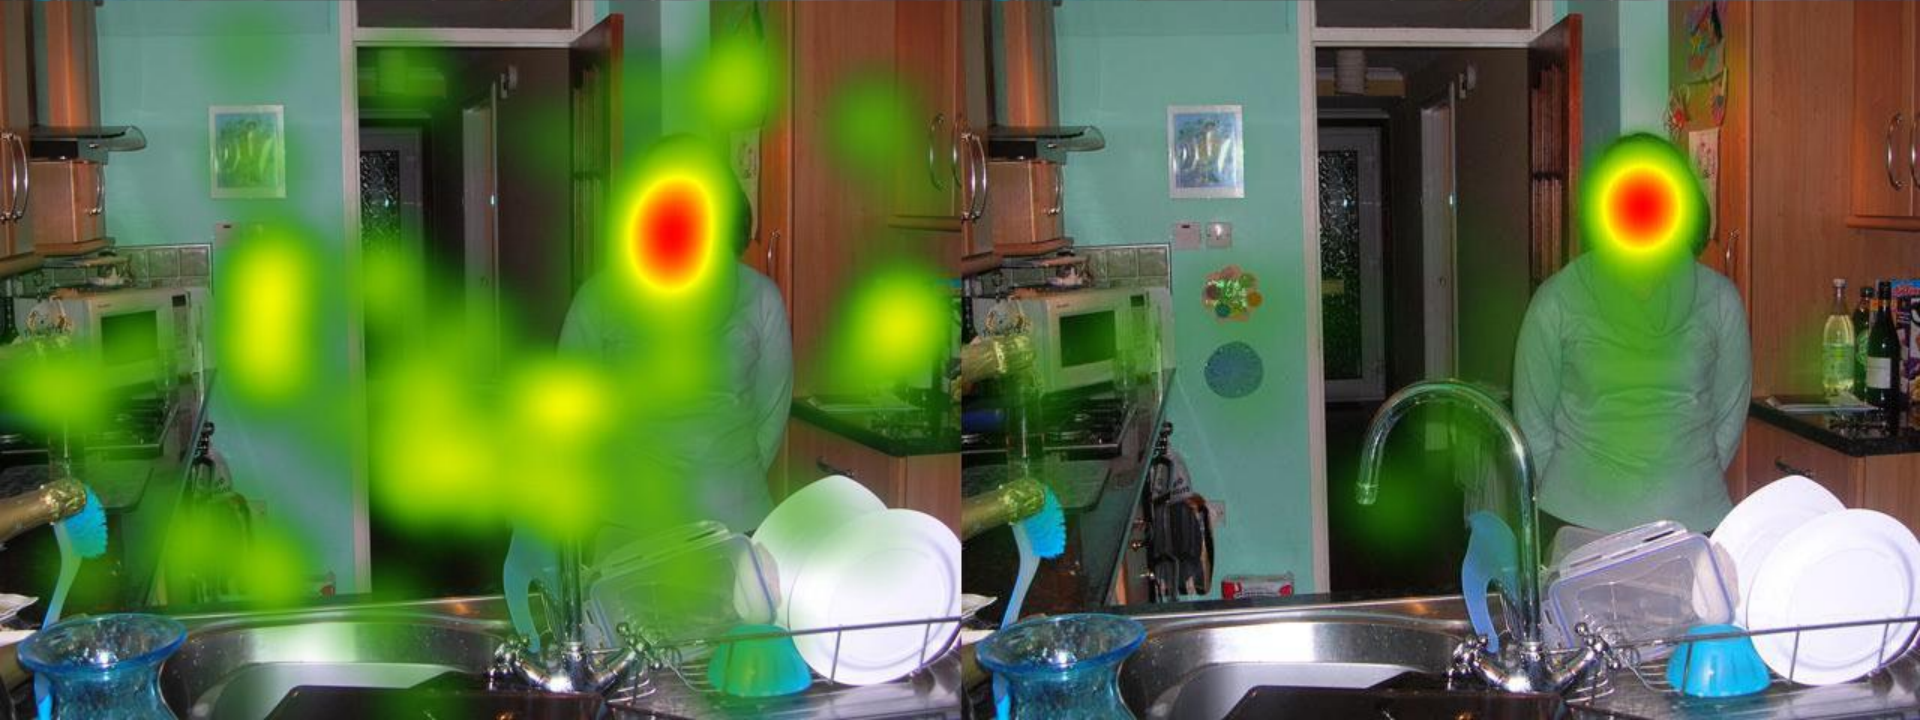



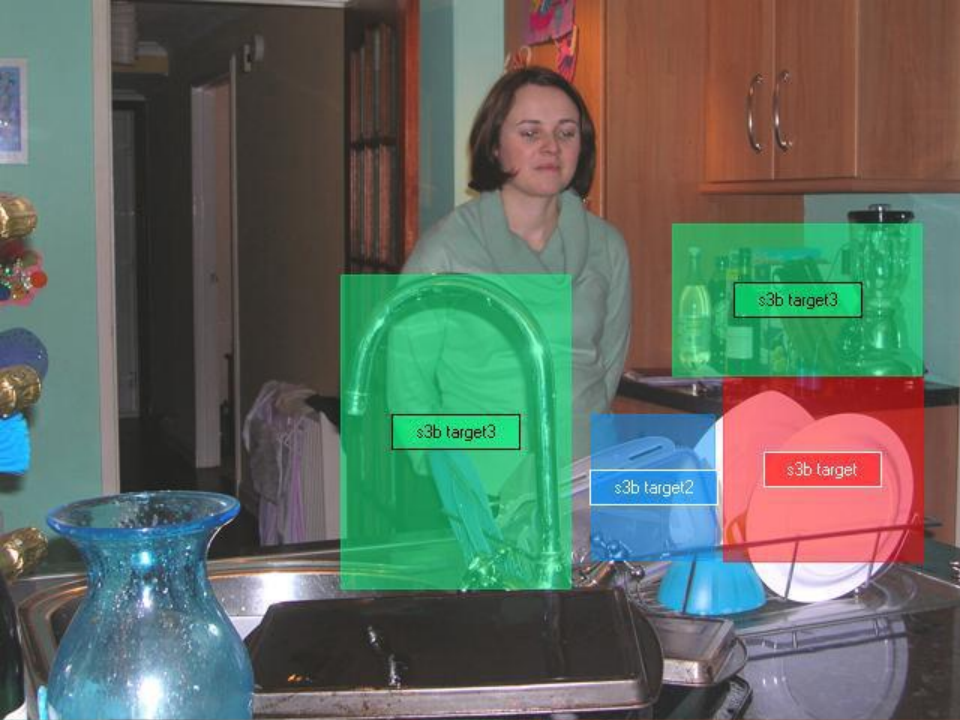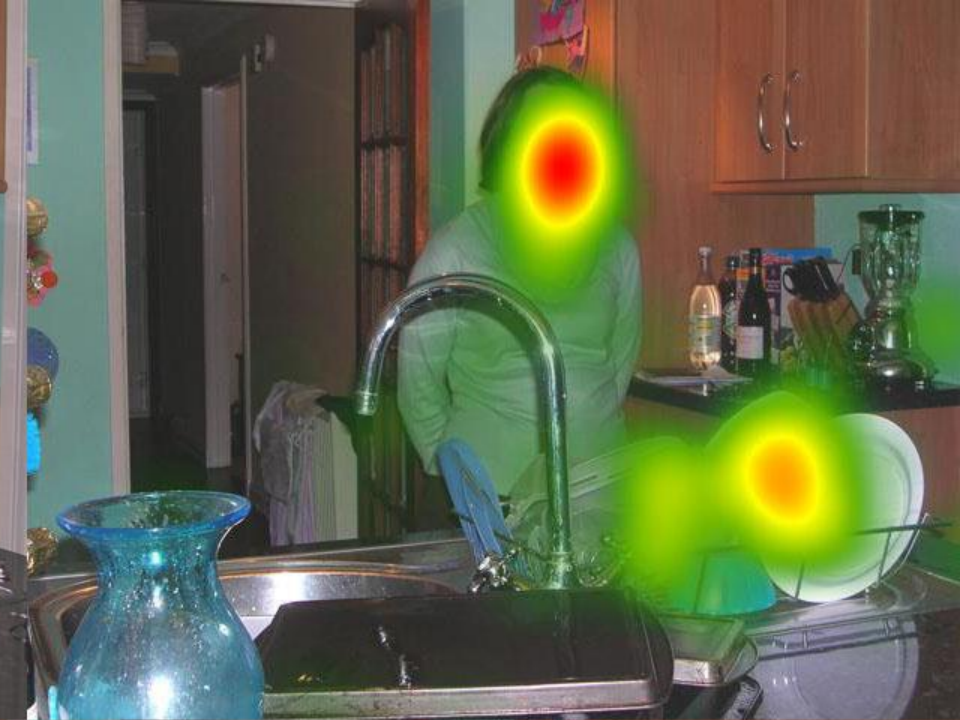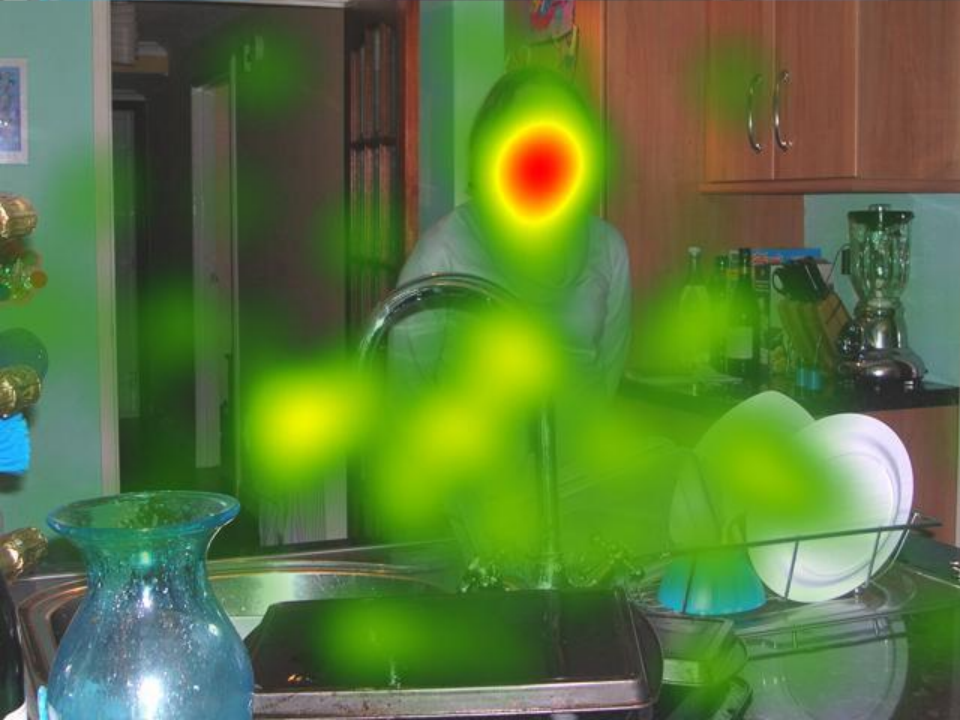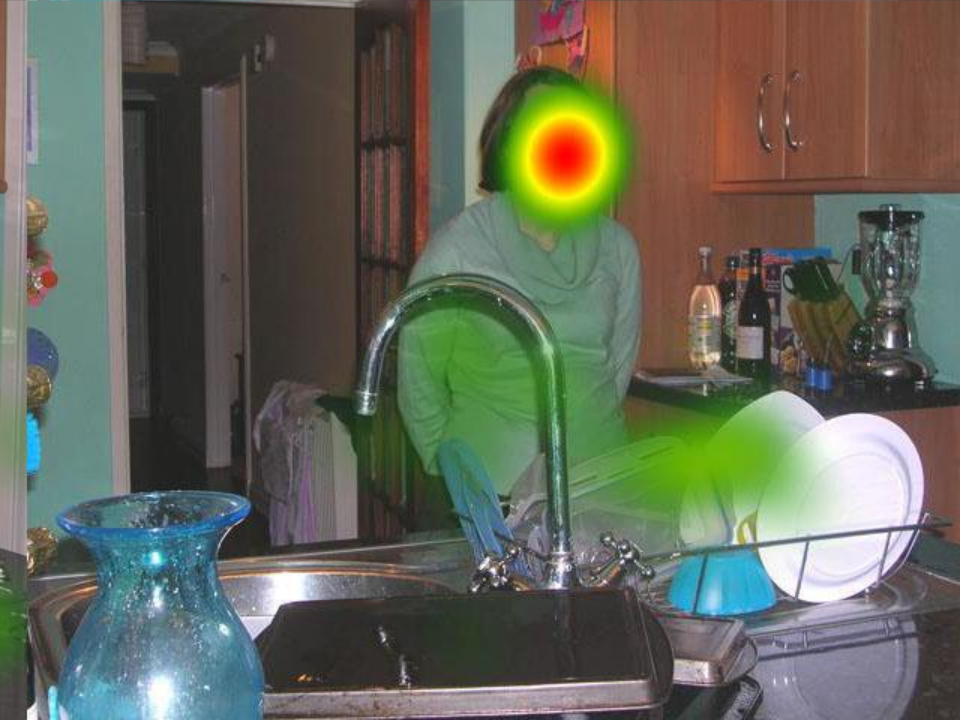



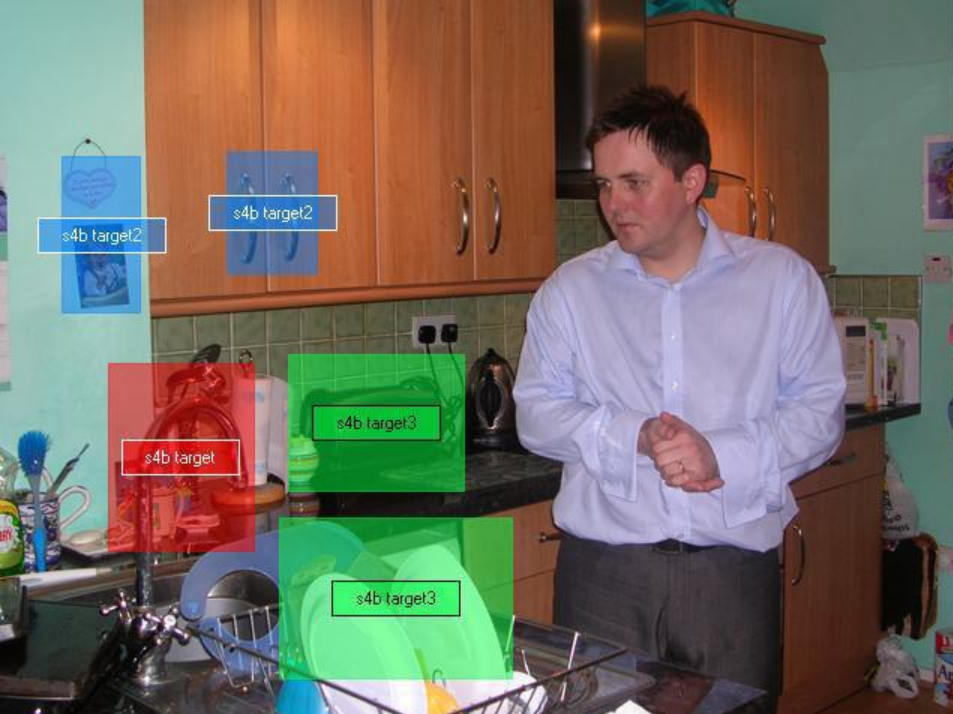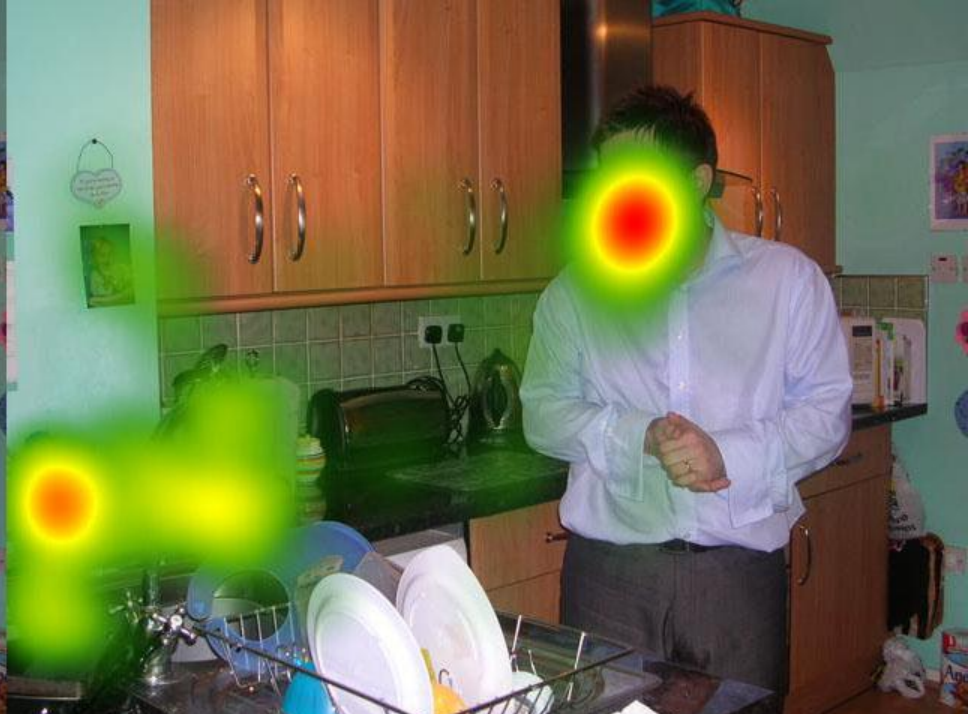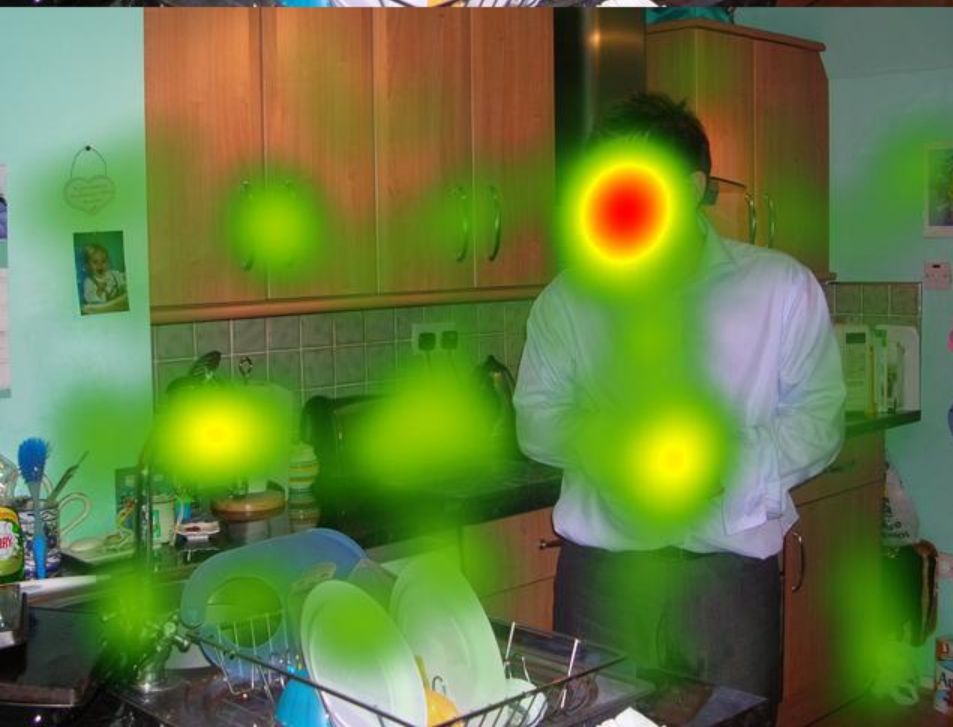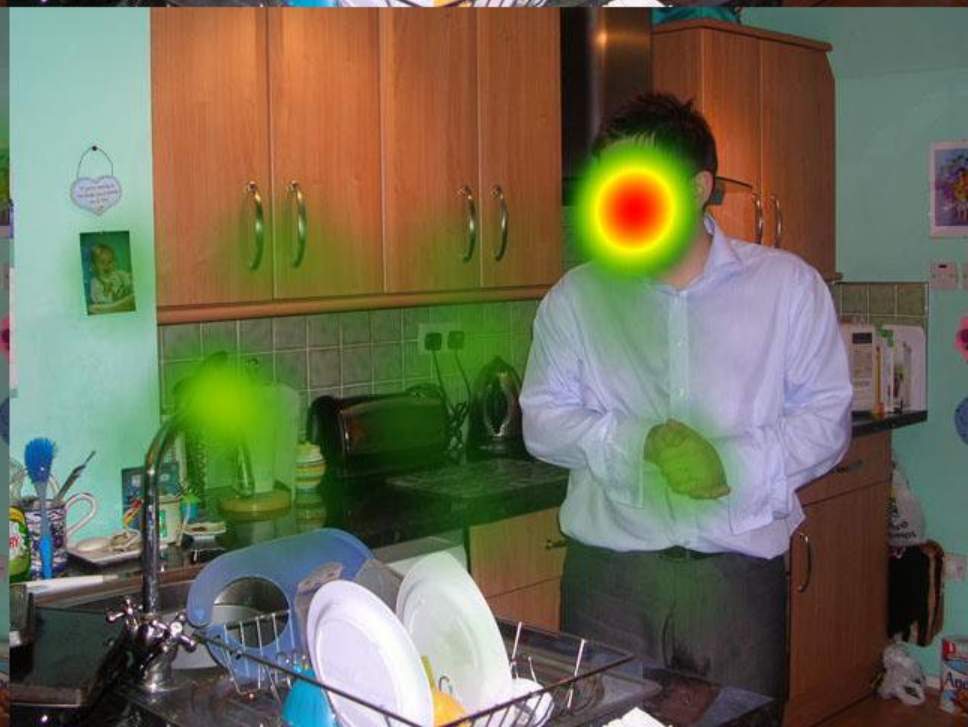



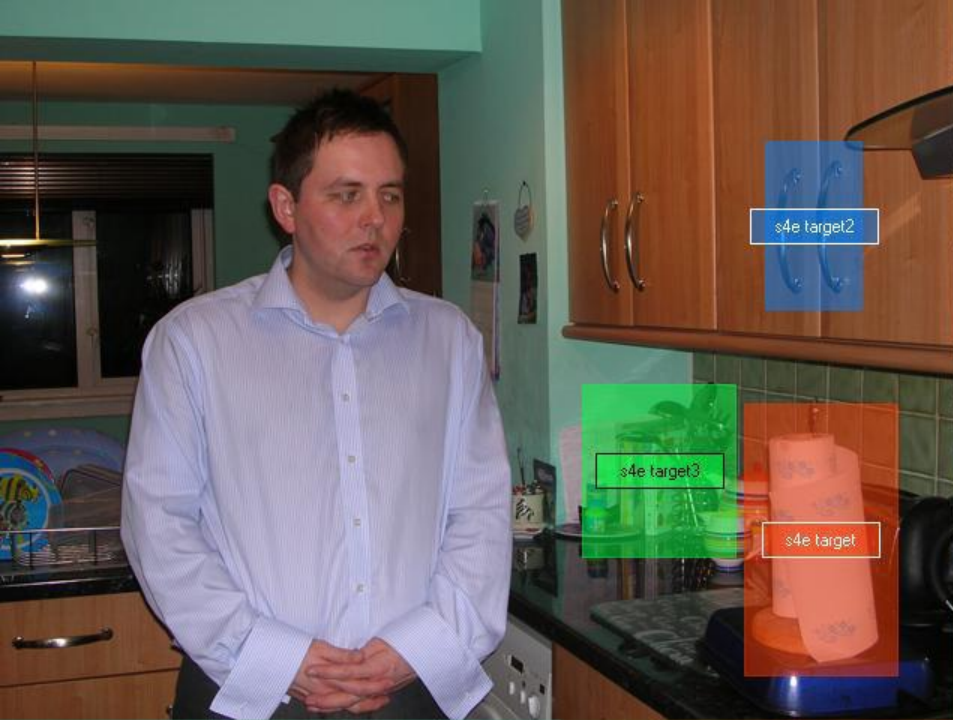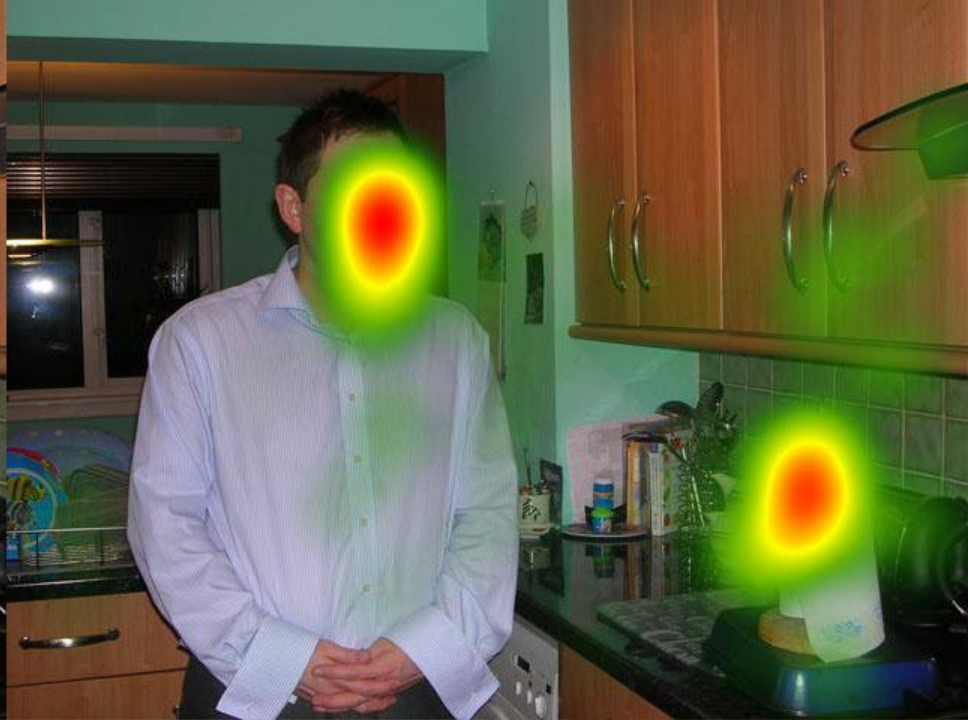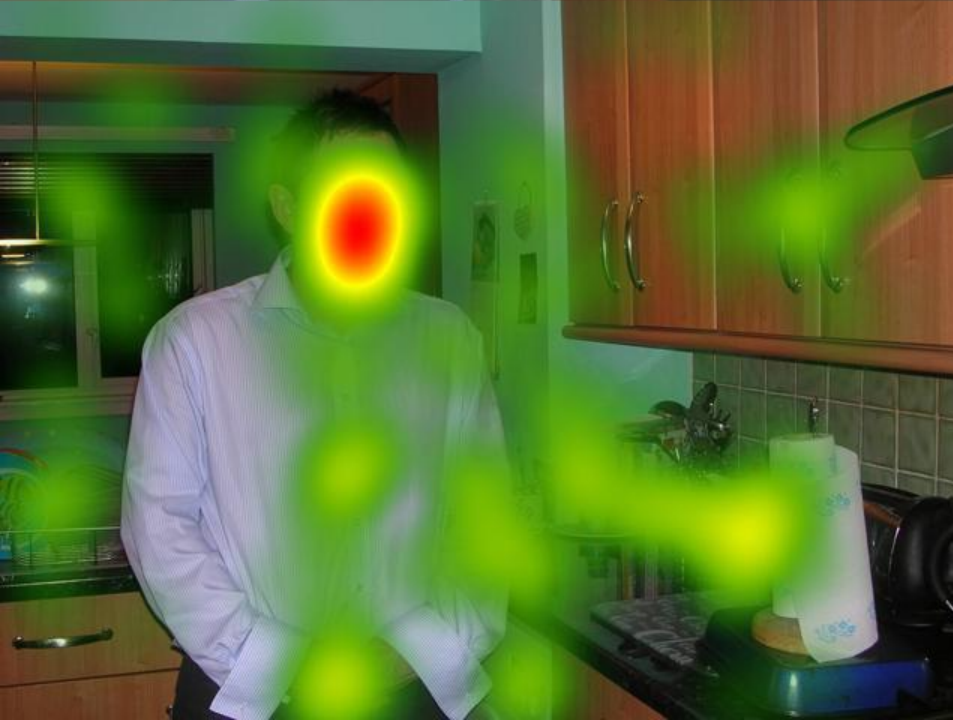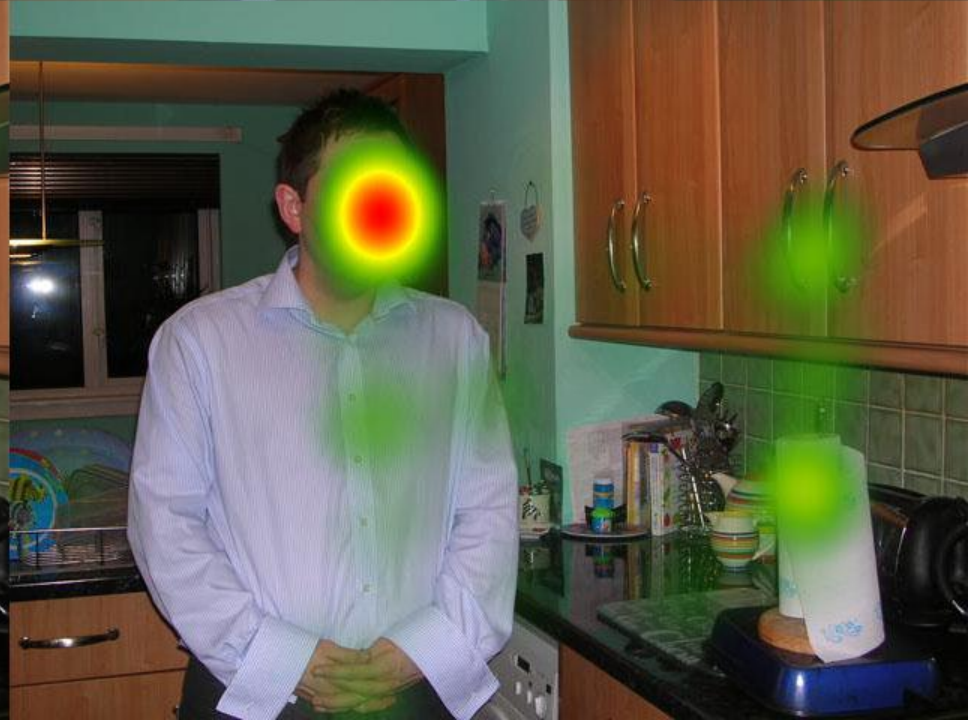



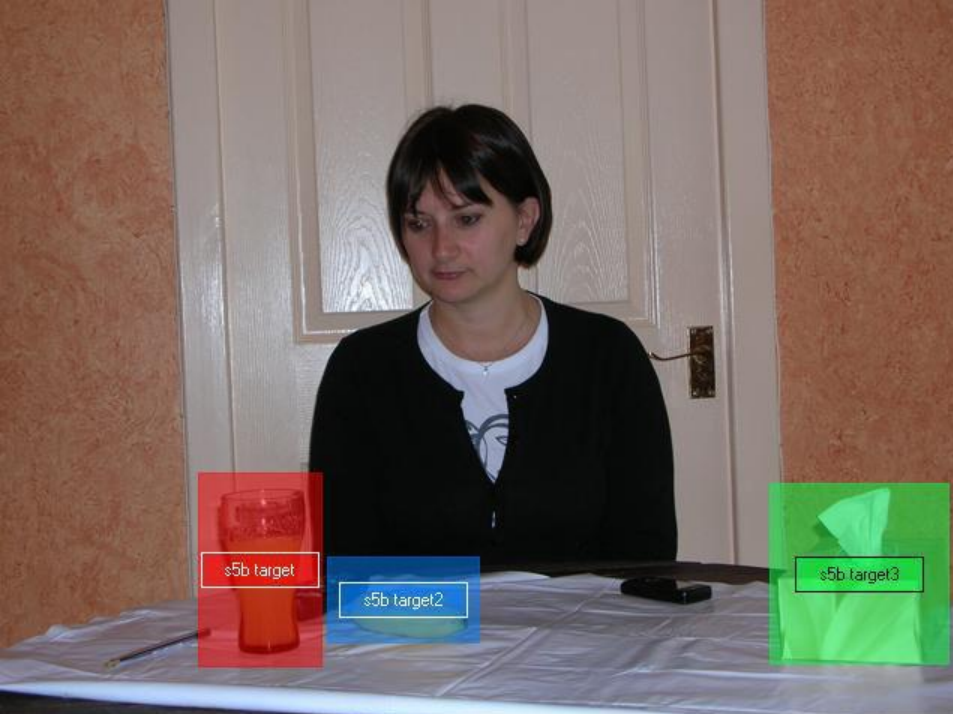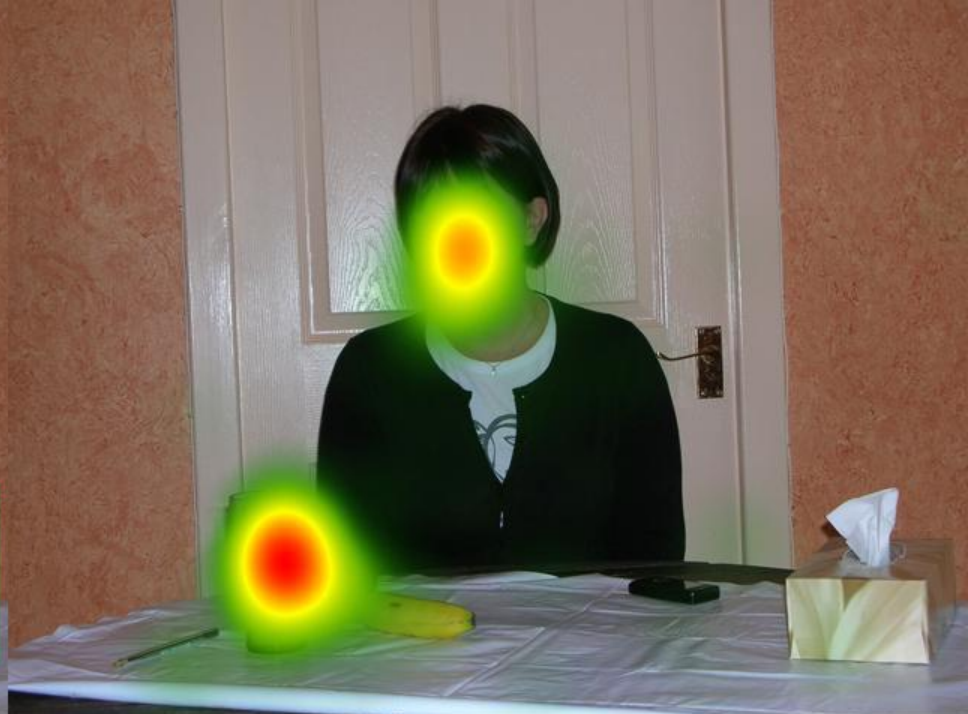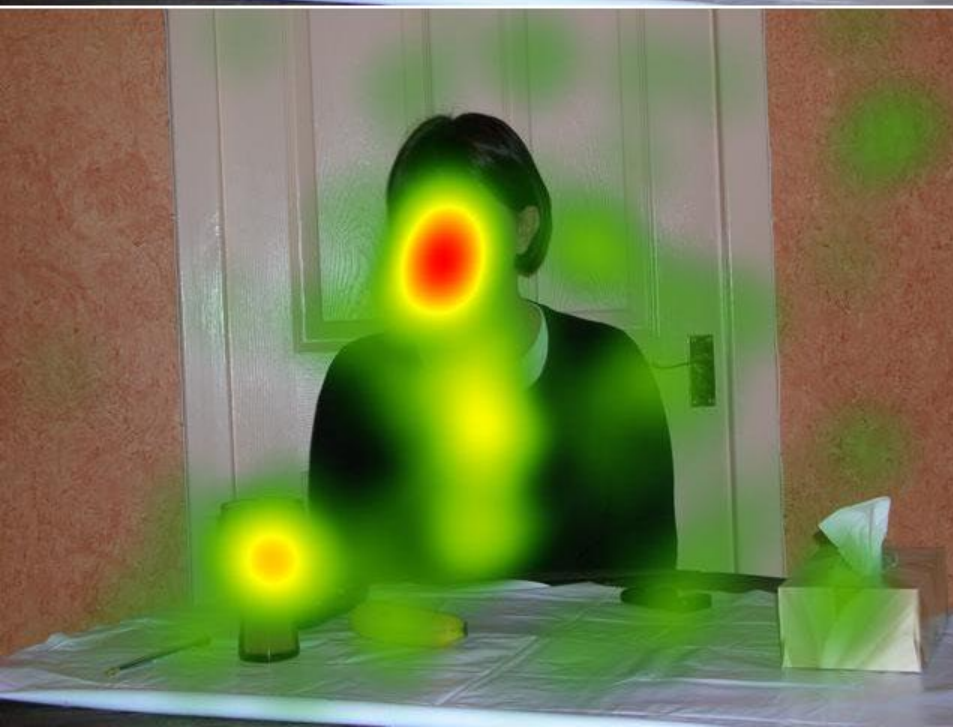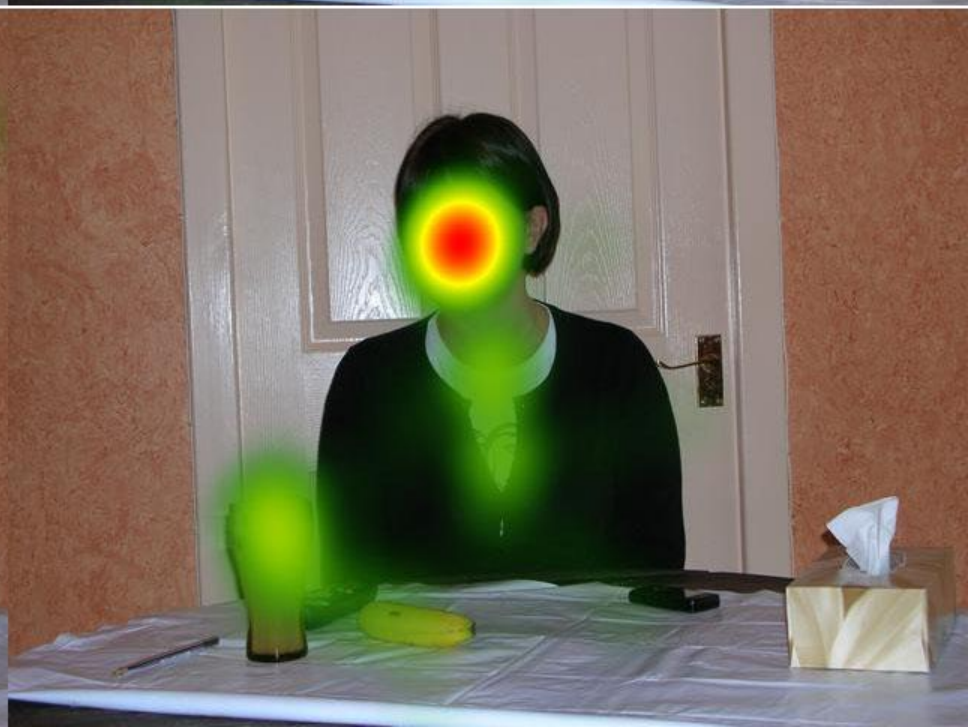



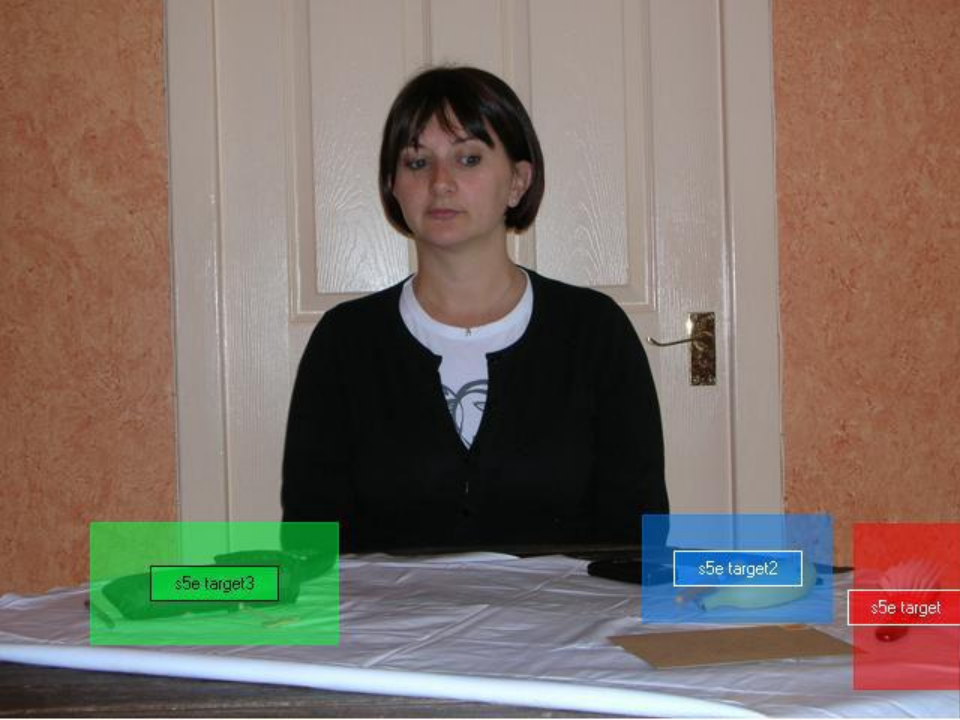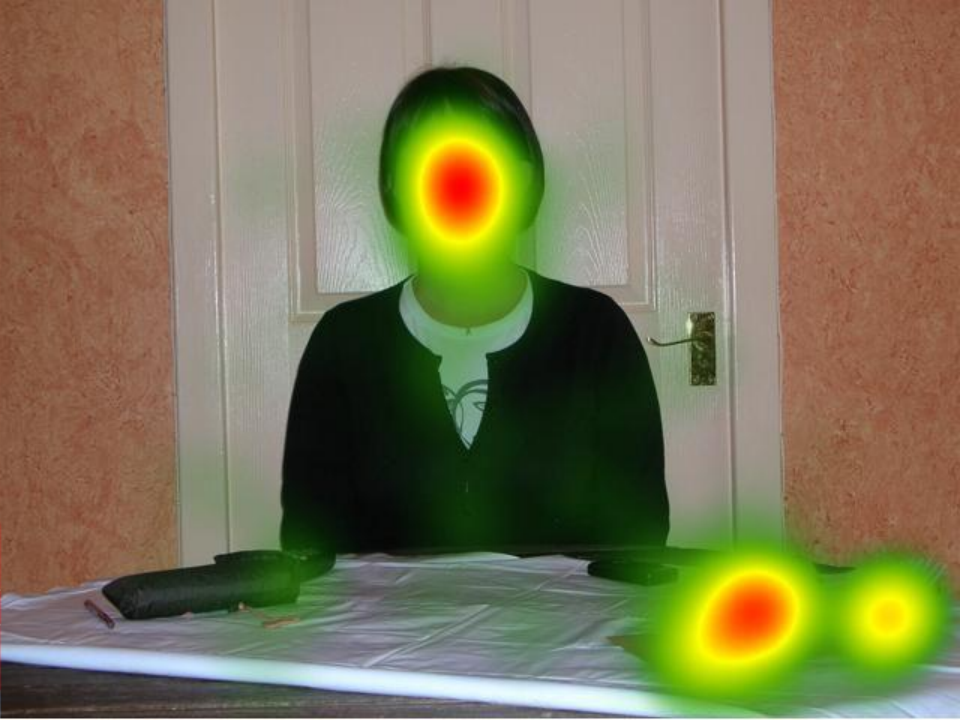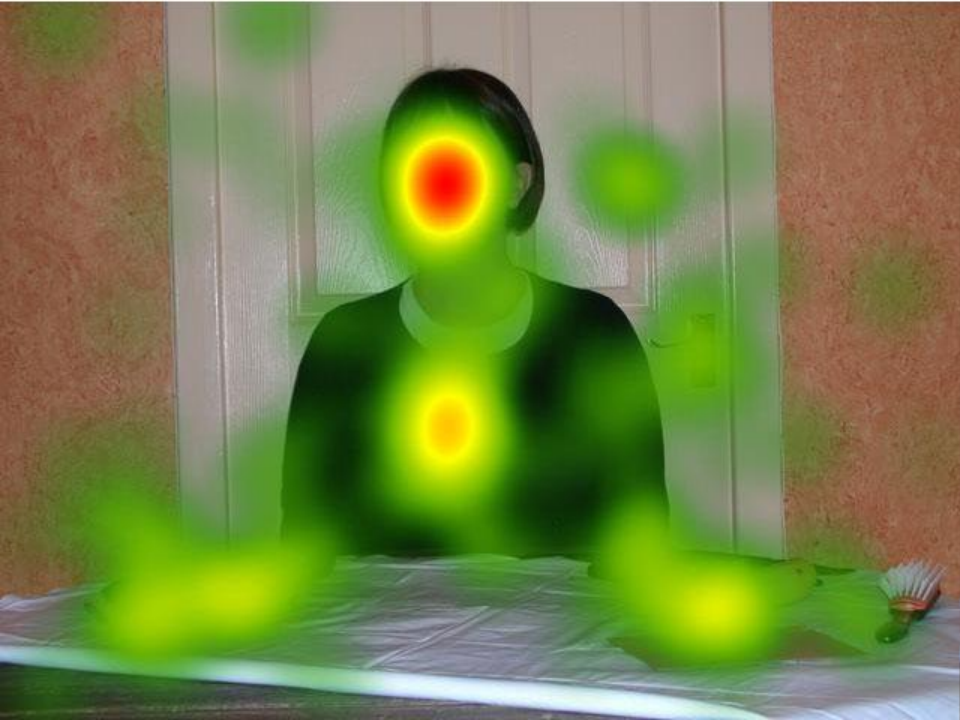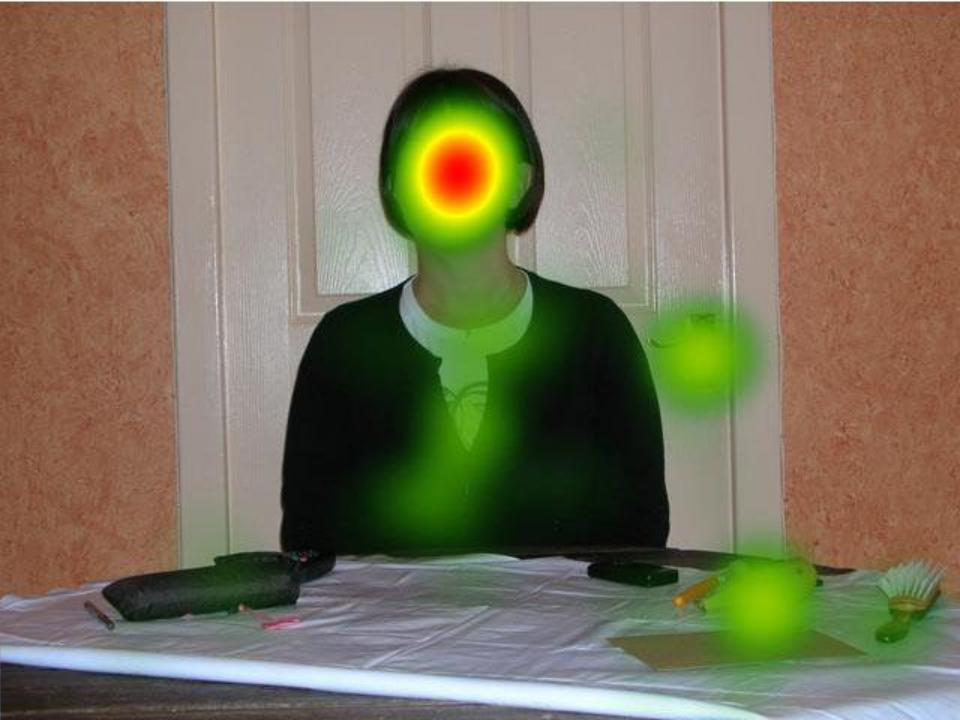



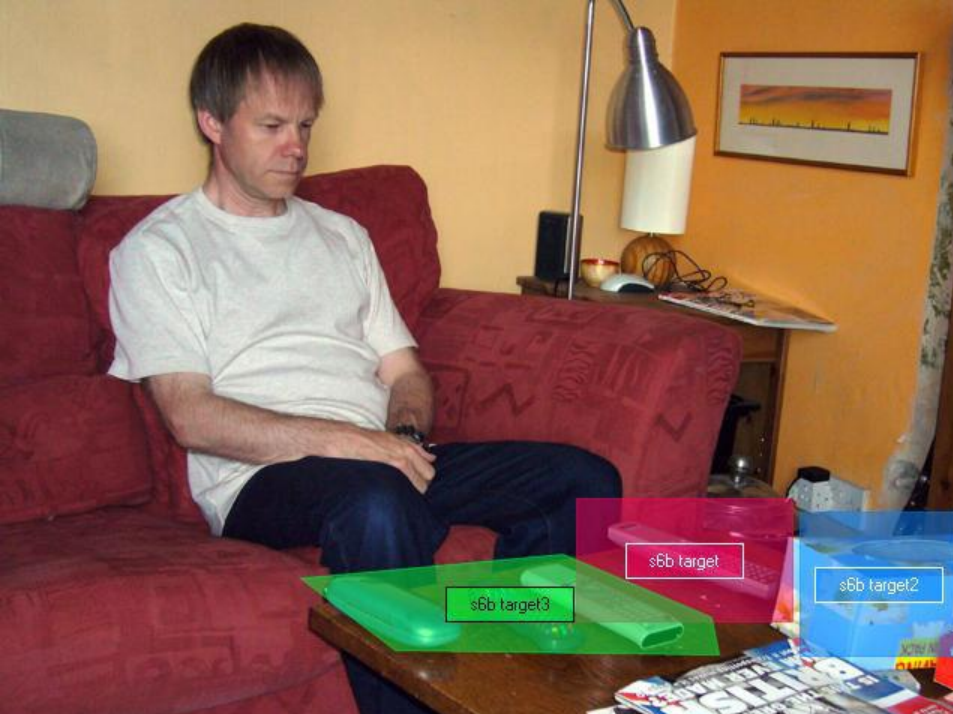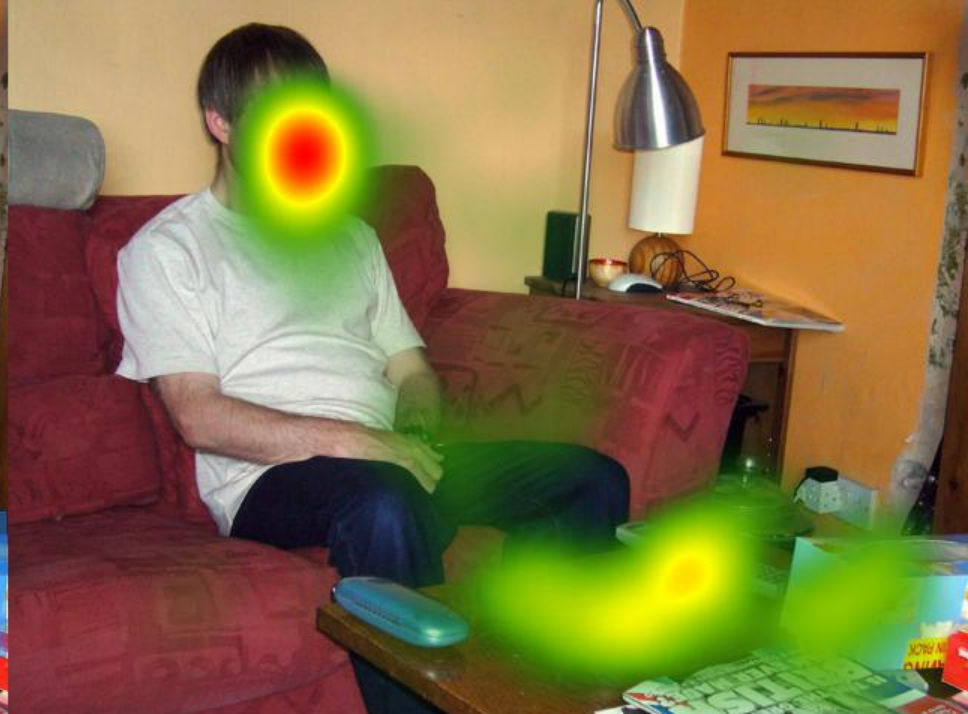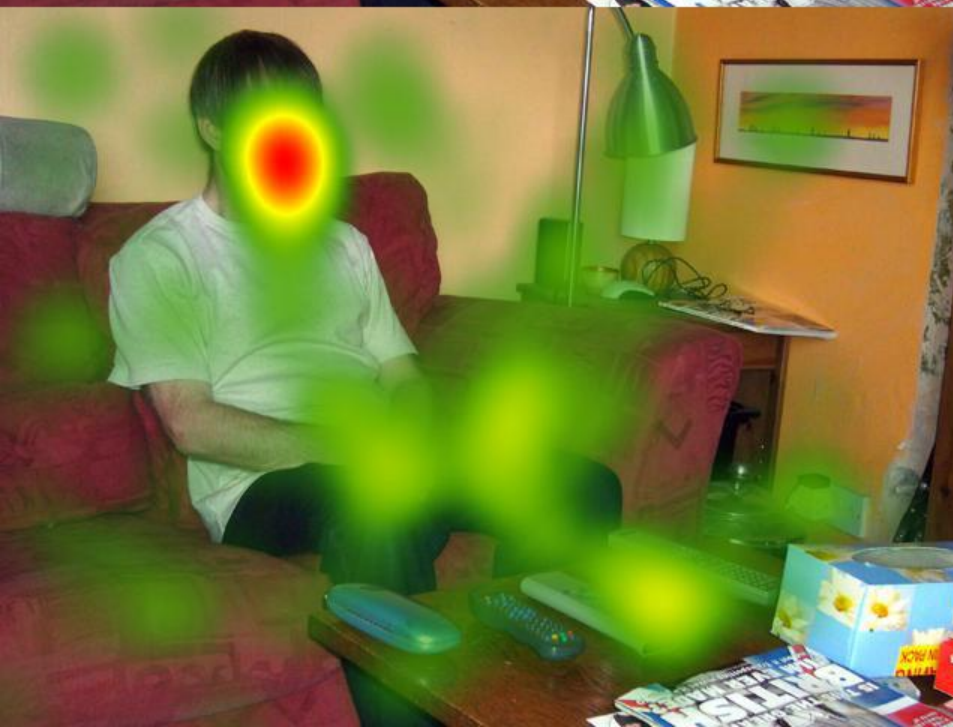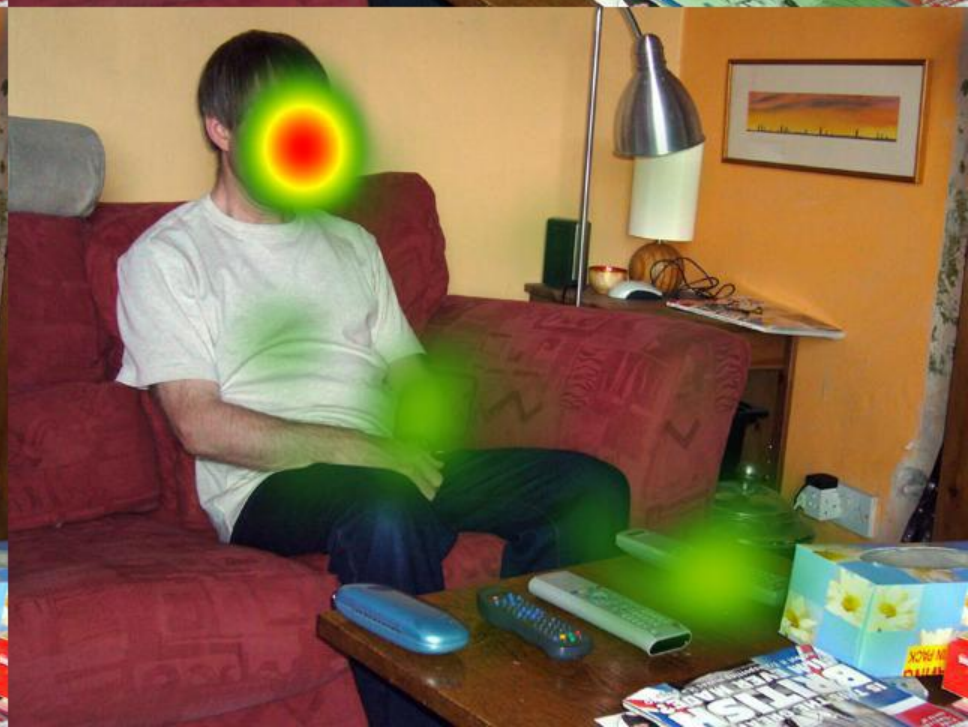



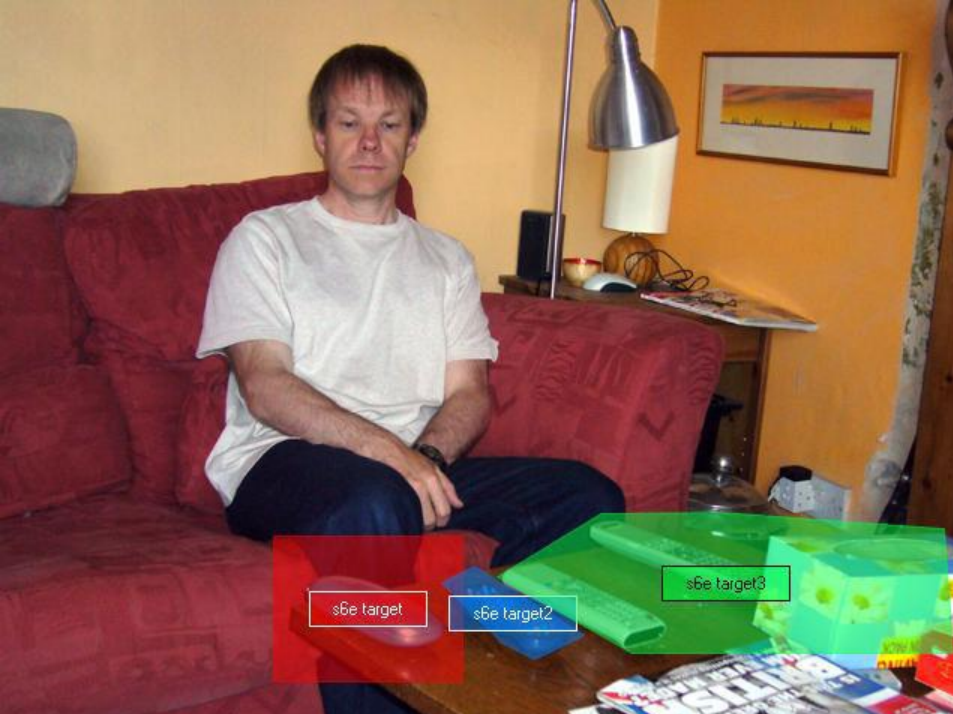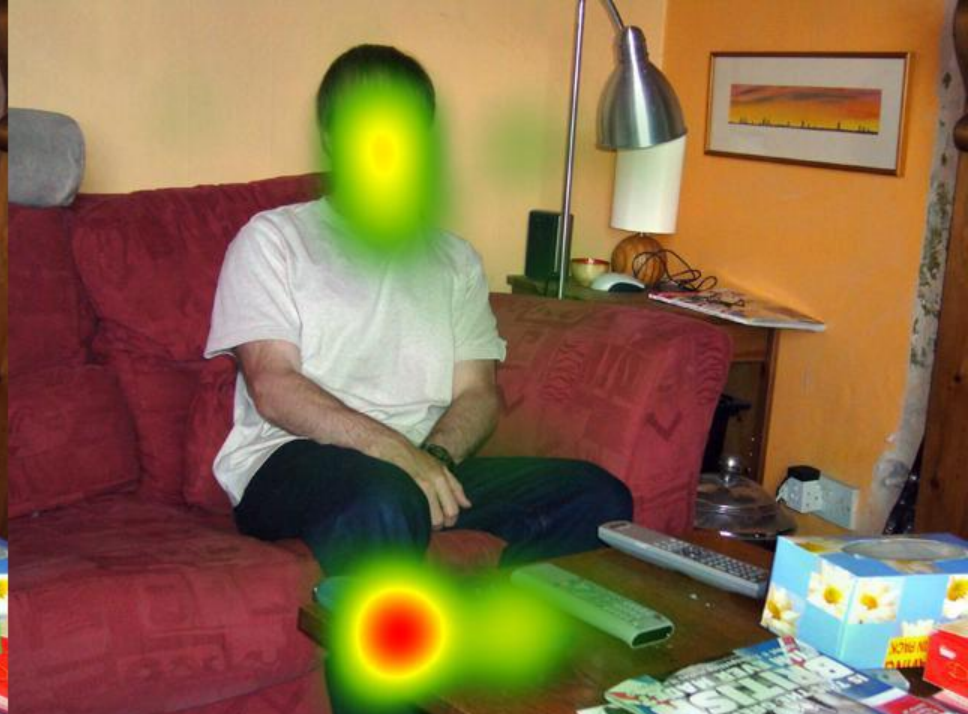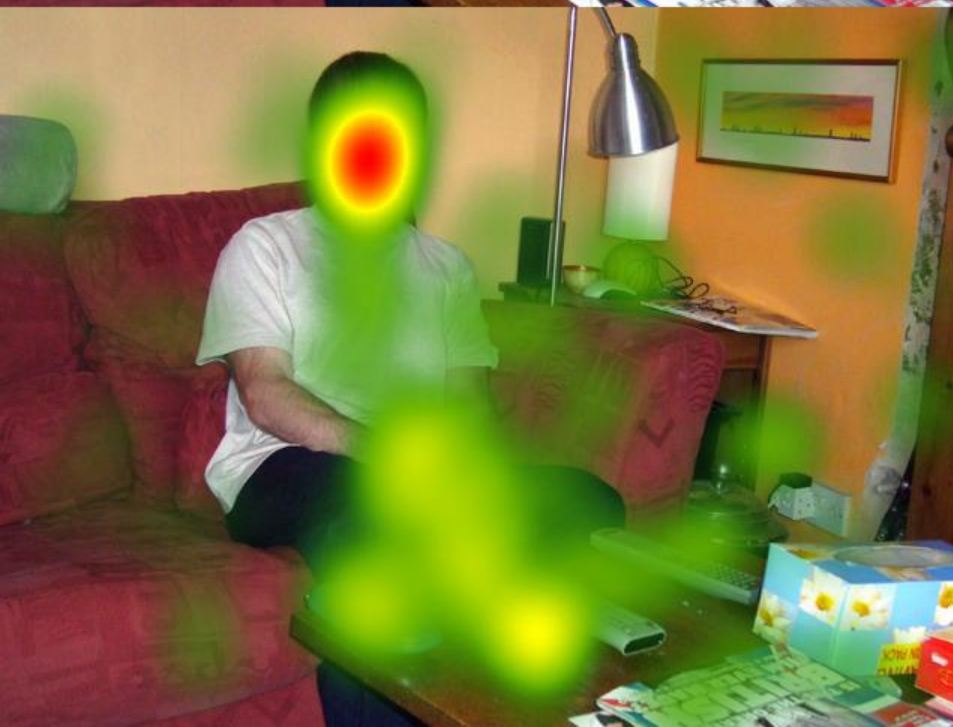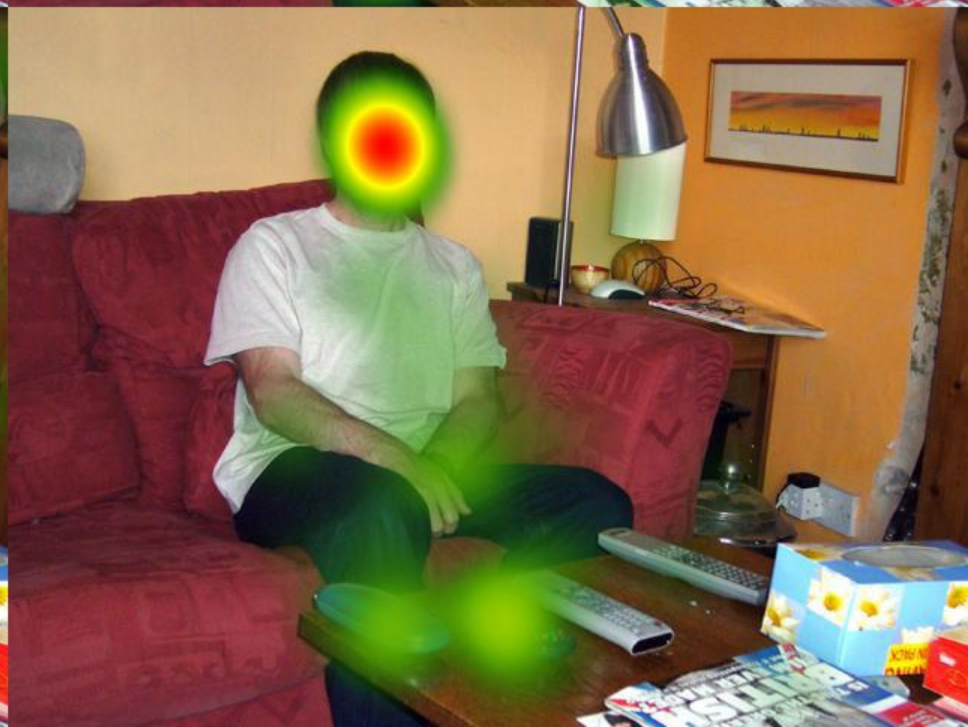



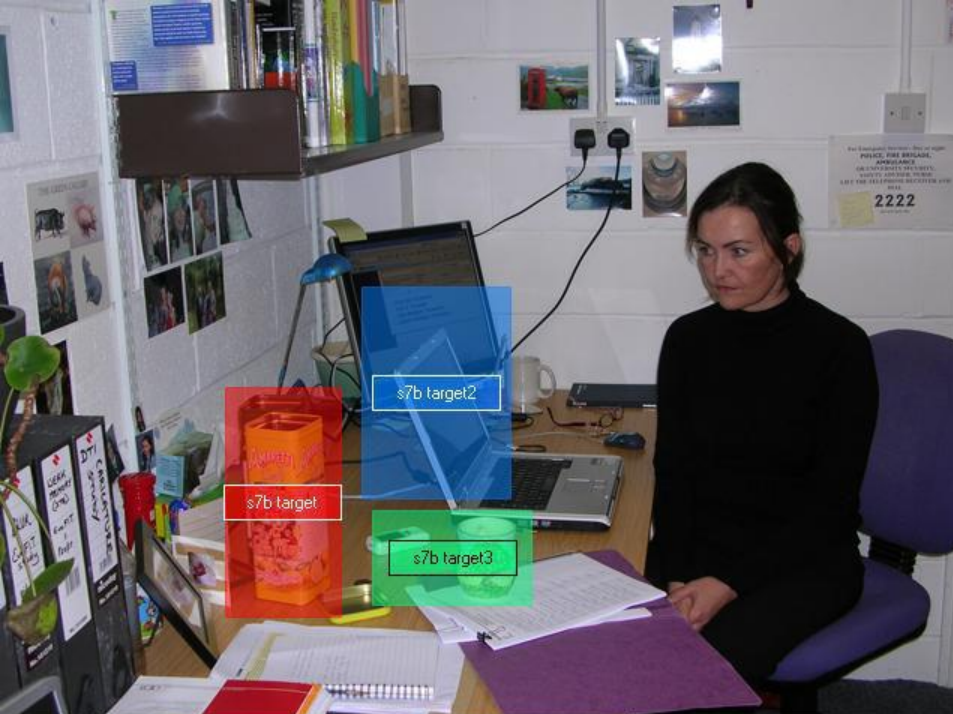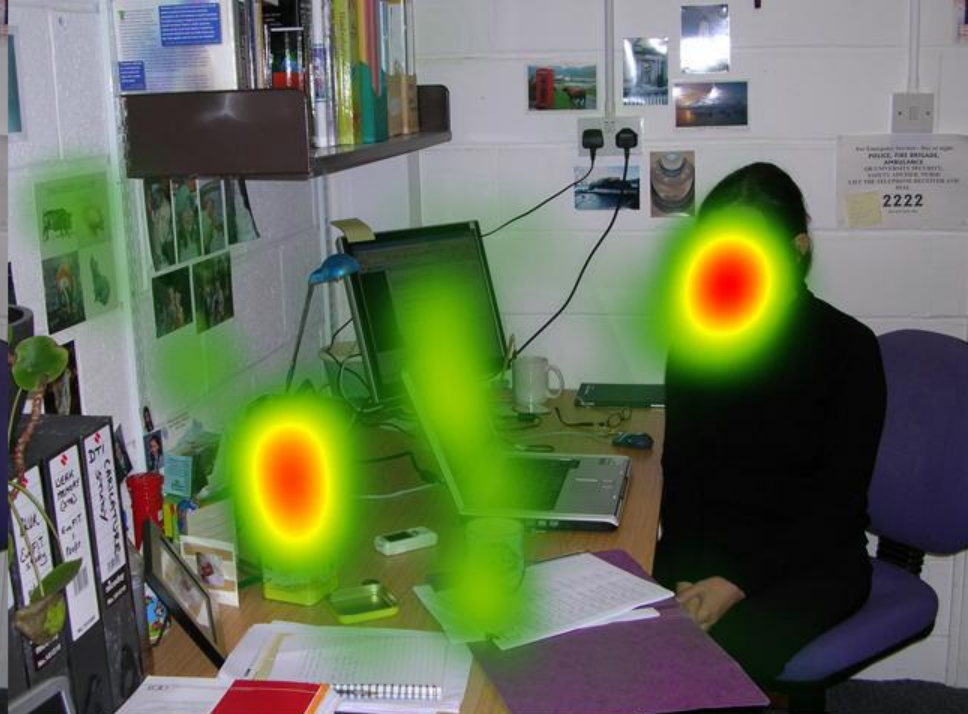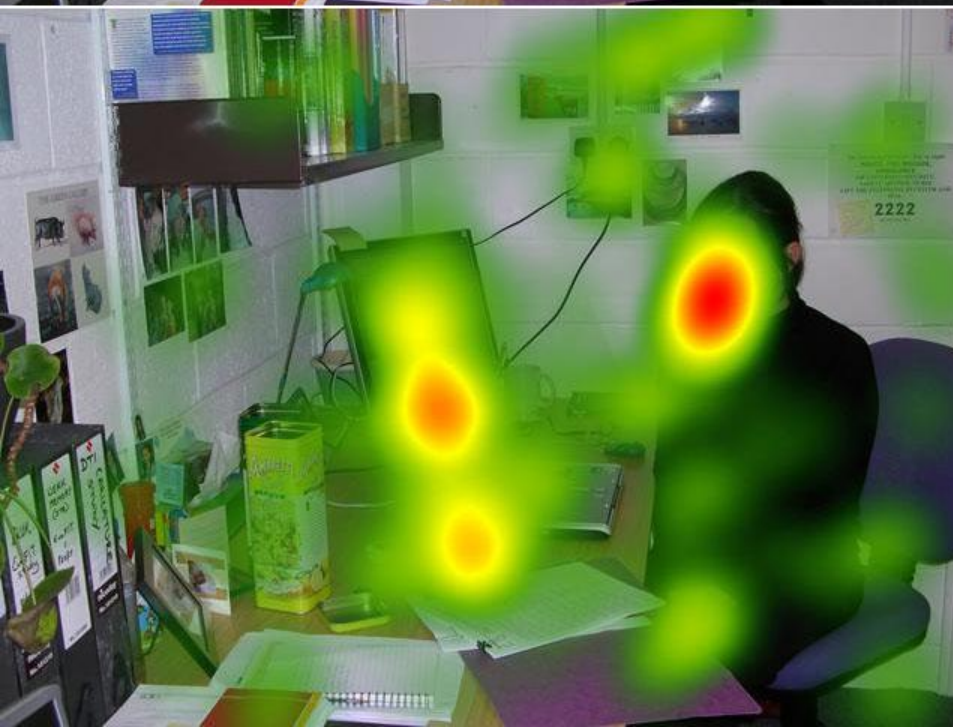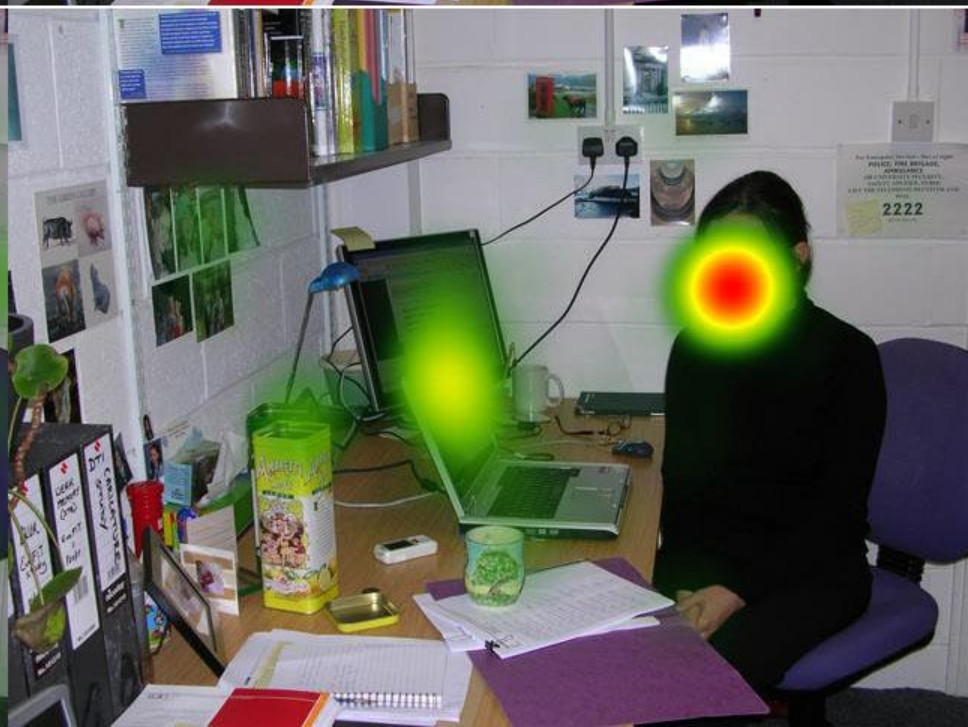



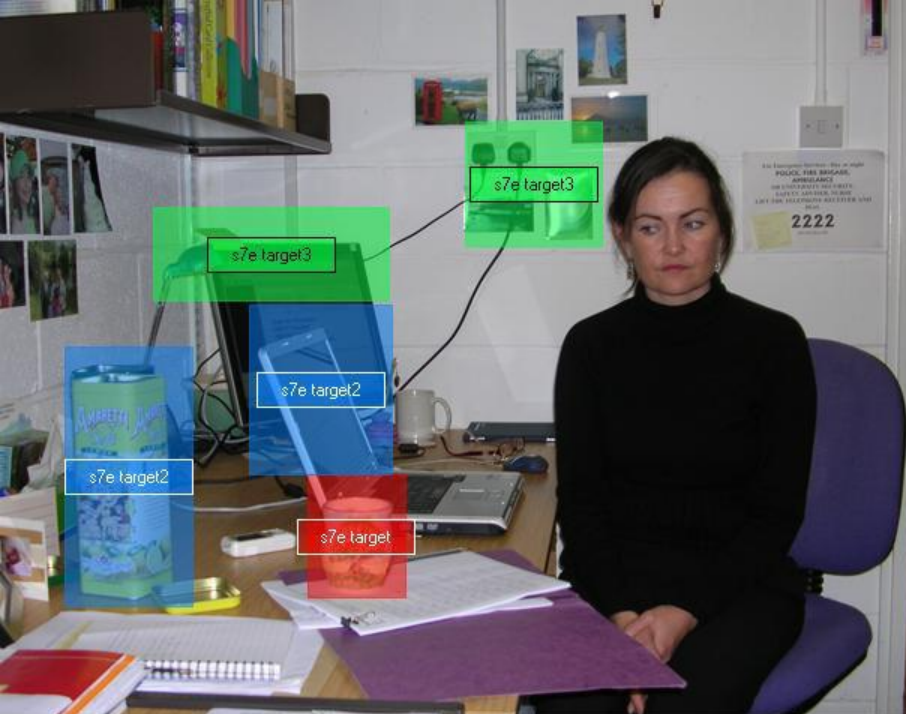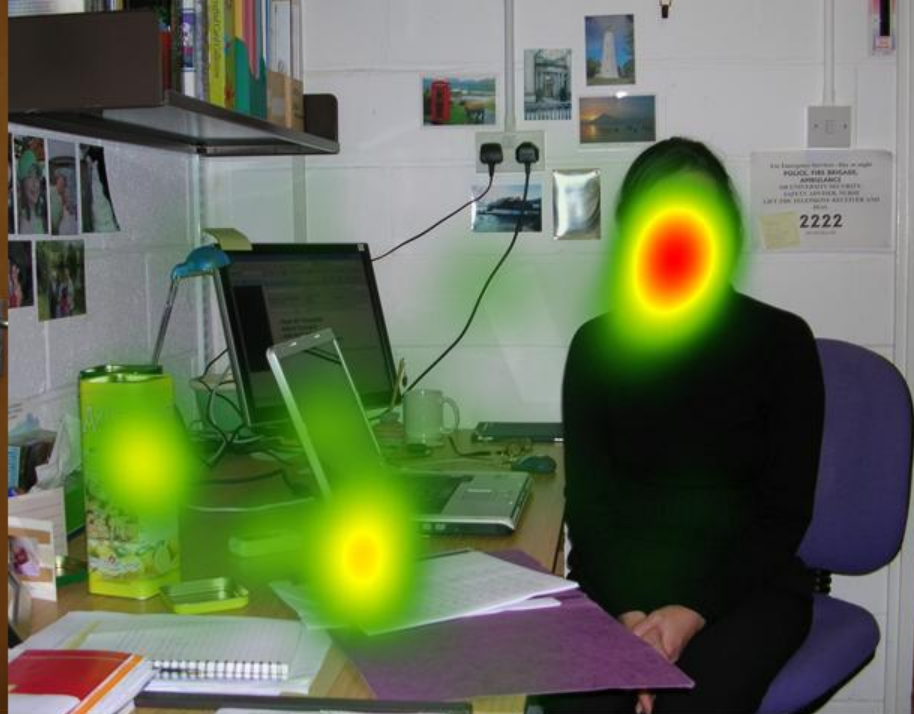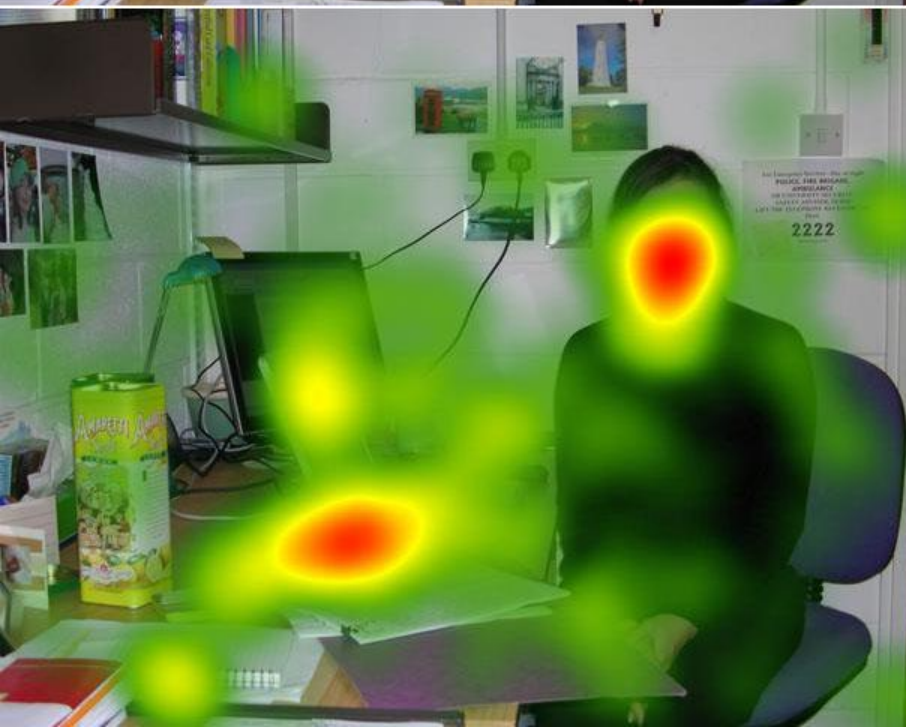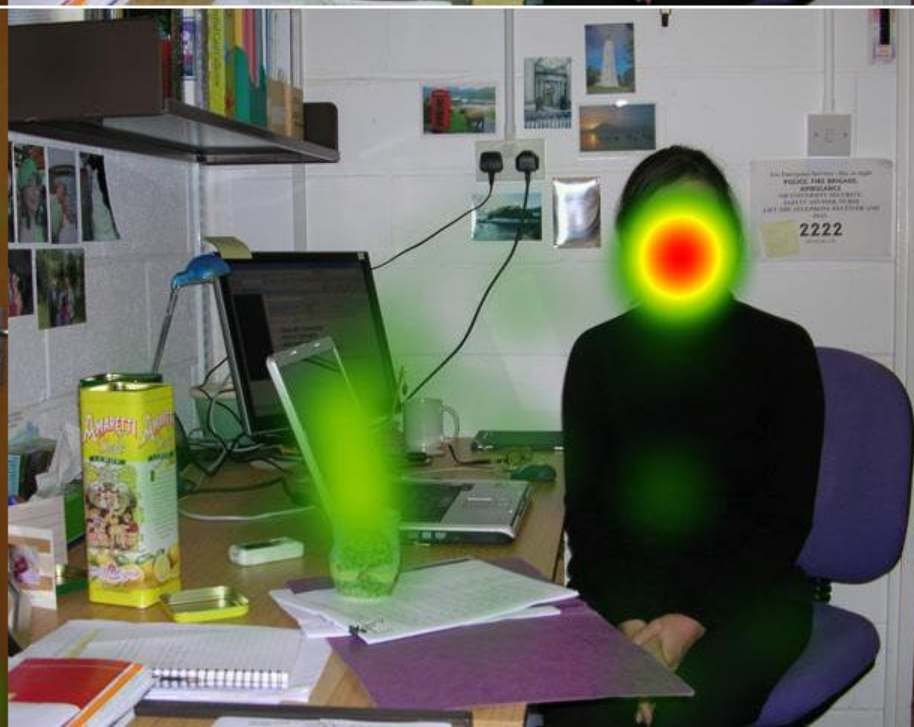

Supplement: 1866-1955-5-13-S1.pdf [file 1866-1955-5-13-S1.pdf]
